# Supplementary material for: Tuning the thermotropic properties of liquid crystalline p-substituted aroylhydrazones
Source: Royal Society of Chemistry journal article supplement (doi:10.1039/c5ra06620d), 2015-01-01
Supplement: c5ra06620d1.pdf [file c5ra06620d1.pdf]

## Supporting Information

### Tuning the thermotropic properties of liquid crystalline *p*-substituted aroylhydrazones

Hemant Kumar Singh<sup>a</sup>, Sachin Kumar Singh<sup>a</sup>, Rajib Nandi<sup>b</sup>, Madan Kumar Singh<sup>a</sup>, Vijay Kumar<sup>a</sup>, Ranjan Kumar Singh<sup>b</sup>, D. S. Shankar Rao<sup>c</sup>, S. Krishna Prasad<sup>c</sup> and Bachcha Singh<sup>a\*</sup>

<sup>a</sup>*Department of Chemistry (Centre of Advance Study), Faculty of Science, Banaras Hindu University, Varanasi-221005, India*

<sup>b</sup>*Department of Physics (Centre of Advance Study), Faculty of Science, Banaras Hindu University, Varanasi-221005, India*

<sup>c</sup>*Centre for nano and soft matter sciences, Jalahalli, Bangalore - 560013, India*

*Email: [bsinghbhu@rediffmail.com](mailto:bsinghbhu@rediffmail.com)*

#### Table of Contents:

|                                                                                                                                                        |          |
|--------------------------------------------------------------------------------------------------------------------------------------------------------|----------|
| 1. General methods                                                                                                                                     | SI 2     |
| 2. Synthesis and analytical data                                                                                                                       | SI 2-14  |
| 3. <sup>1</sup> H NMR and <sup>13</sup> C NMR Spectra of all new compounds                                                                             | SI 15-24 |
| 4. Raman Spectra of compound N-(4-(dodecyloxy)benzylidene)-4-{{(4'-(dodecyloxy)benzylidene) - amino}benzohydrazide at different phase, <b>1</b> (n=12) | SI 25-26 |
| 5. The optimized structure of compounds <b>1</b> (n=12).                                                                                               | SI 26    |
| 6. XRD pattern of compound <b>4</b> (n=10)                                                                                                             | SI 27    |
| 7. The optimized structure of compounds <b>5</b> (n=10)                                                                                                | SI 27    |
| 8. Room temperature Raman Spectrum of compound <b>5</b> (n= 10)                                                                                        | SI 28    |
| 9. DSC Table of compounds <b>2</b> (n= 5-16) and <b>3</b> (n= 5-16)                                                                                    | SI 29    |

## 1. General methods

Ethyl 4-aminobenzoate, 4-hydroxybenzaldehyde, 3,4-dihydroxybenzaldehyde, 3,5-dihydroxybenzaldehyde, 2,3,4-trihydroxybenzaldehyde, 3,4,5-trihydroxybenzaldehyde, hydrazine monohydrate, potassium iodide, anhydrous  $K_2CO_3$ , bromoalkanes purchased from Aldrich Chemicals, USA were used as received. All other solvents and reagents were purchased from Merck, India. The solvents were dried using standard methods when required [S1]. Elemental analyses were performed on a CE-440 Exeter Analytical CHN analyser. IR spectra ( $4000\text{--}100\text{ cm}^{-1}$ ) were recorded on a Varian 3100 FT-IR Excalibur series spectrophotometer.  $^1H$  and  $^{13}C$  NMR spectra were obtained on a JEOL FT-NMR AL 300 MHz spectrometer using tetramethylsilane as the internal standard. Differential scanning calorimetry (DSC) thermograms were recorded with a Mettler Toledo TC 15 TA differential scanning calorimeter at the rate of  $5.0\text{ K min}^{-1}$  under a nitrogen atmosphere using spec pure grade indium as standard by taking samples in close-lid aluminium pans. The transition temperatures from DSC thermograms have been determined with an accuracy of  $\pm 0.1\text{ K}$ . The mesophase type was identified by visual comparison with known phase standards using a Nikon Eclipse LV-100 POL polarizing optical microscope (POM) fitted with a hot stage temperature-controlled LTSE 420 heating stage (Linkam Scientific Instruments, Tadworth, Surrey, UK) with temperature controlling accuracy of  $0.1\text{ K}$ . The GAUSSIAN-09 program [S2] package was employed to carry out DFT calculations at the Becke's three parameter functionals and Lee, Yang and Parr correlation functionals (B3LYP) [S3,4]. The internal coordinates of the system, which is used as input for GAUSSIAN-09 program was generated by the GAUSS VIEW 4.1 program [S5]. The temperature dependent Raman spectra were measured on a micro-Raman setup, Renishaw, UK equipped with a grating of  $2400\text{ lines mm}^{-1}$  and CCD. The  $532\text{ nm}$  exciting line from Nd:YAG laser was used as an excitation source. The sample was kept in a quartz sample holder which was put on a temperature-controlled THM 600 hot stage (Linkam Scientific Instruments, Tadworth, Surrey, UK) below the Lieca  $50\times$  long distance microscope objective. The accuracy in the measurement of temperature was  $\pm 0.1^\circ\text{C}$ . The Raman scattered light was collected in the back-scattering geometry. The software used for collecting the spectra was *WiRE-4*. The recorded data were analyzed using *Spectra Calc* and *Origin* software. Variable temperature powder X-ray diffraction PXRD studies were carried out using an image plate detector (Mac Science, Japan) equipped with double mirror focusing optics, with the sample contained in a Lindmann capillary tube.

## 2. Synthesis and analytical data

### 2.1 Synthesis of *N*-(4-(*pentyl*oxy)benzylidene)-4-{4'-(*pentyl*oxy)benzylidene}amino}benzohydrazide (1, $n=5$ )

The compound 1 ( $n=5$ ) was prepared by refluxing together absolute ethanolic solution of 4-pentylxybenzaldehyde (10 mmol, 1.92 g) and 4-aminobenzohydrazide (10 mmol, 1.51 g) for  $\sim 8\text{ h}$  in the presence of few drops of acetic acid and leaving solution overnight in the flask closed with guard tube. The microcrystalline white coloured solid was filtered off by suction, thoroughly washed with cold ethanol and recrystallised from a mixture of absolute ethanol and chloroform (1:2 v/v) and dried at room temperature.

All the other members of the series were prepared in a similar manner. The yield, IR, NMR and elemental data for the compounds are summarized as follows.

Yield: 80 %. IR (KBr,  $\text{cm}^{-1}$ ): 3286  $\nu_s$  (N-H), 2918, 2852 (aliphatic C-H), 1649 (amide-I, C=O), 1578 (amide-II, N-H), 1628 (-C=N), 1609, 1512 (Ph), 1303, 1255 (OPh), 1029 (N-N);  $^1\text{H}$  NMR (300 MHz, DMSO- $d_6$ , 60°C):  $\delta$  11.50 (s, 1H, -NH), 8.55 (s, 1H, -CH=N), 8.39 (s, 1H, -CH=N), 7.96 (dd,  $J_1(\text{H,H})=8.1$  Hz,  $J_2(\text{H,H})=8.7$  Hz, 4H, -C<sub>6</sub>H<sub>4</sub>), 7.65 (d,  $J_1(\text{H,H})=8.1$  Hz, 2H, -C<sub>6</sub>H<sub>4</sub>), 7.31 (d,  $J_1(\text{H,H})=8.4$  Hz, 2H, -C<sub>6</sub>H<sub>4</sub>), 7.08 (dd,  $J_1(\text{H,H})=8.7$  Hz,  $J_2(\text{H,H})=8.7$  Hz, 4H, -C<sub>6</sub>H<sub>4</sub>), 4.09 (m, 4H,  $J_1(\text{H,H})=6.3$  Hz, -OCH<sub>2</sub>), 1.75 (m, 4H, -OCH<sub>2</sub>CH<sub>2</sub>), 1.40 (m, 8H, -[CH<sub>2</sub>]<sub>4</sub>), 0.93 (t,  $J_1(\text{H,H})=6.3$  Hz, 6H, -CH<sub>3</sub>);  $^{13}\text{C}$  NMR (75 MHz, DMSO- $d_6$ , 60°C):  $\delta_c$  176.95, 161.34, 160.22, 154.14, 147.09, 130.17, 130.08, 128.36, 127.98, 126.68, 121.42, 119.98, 115.36, 114.49, 67.53, 30.65, 28.09, 24.85, 21.36, 13.07; Elemental analyses: calculated for C<sub>31</sub>H<sub>37</sub>N<sub>3</sub>O<sub>3</sub> (%), C, 74.52; H, 7.46; N, 8.41; Found, C, 74.44; H, 7.39; N, 8.45.

### 2.2 Synthesis of *N*-(4-(hexyloxy)benzylidene)-4-*l*-(4'-(hexyloxy)benzylidene)amino}benzohydrazide (*l*, *n*=6)

Yield: 82 %. IR (KBr,  $\text{cm}^{-1}$ ): 3285  $\nu_s$  (N-H), 2918, 2852 (aliphatic C-H), 1650 (amide-I, C=O), 1577 (amide-II, N-H), 1629 (-C=N), 1609, 1512 (Ph), 1304, 1253 (OPh), 1028 (N-N);  $^1\text{H}$  NMR (300 MHz, DMSO- $d_6$ , 60°C):  $\delta$  11.47 (s, 1H, -NH), 8.55 (s, 1H, -CH=N), 8.40 (s, 1H, -CH=N), 7.96 (dd,  $J_1(\text{H,H})=8.1$  Hz,  $J_2(\text{H,H})=8.7$  Hz, 4H, -C<sub>6</sub>H<sub>4</sub>), 7.66 (d,  $J_1(\text{H,H})=8.1$  Hz, 2H, -C<sub>6</sub>H<sub>4</sub>), 7.31 (d,  $J_1(\text{H,H})=8.4$  Hz, 2H, -C<sub>6</sub>H<sub>4</sub>), 7.08 (dd,  $J_1(\text{H,H})=8.7$  Hz,  $J_2(\text{H,H})=8.7$  Hz, 4H, -C<sub>6</sub>H<sub>4</sub>), 4.09 (m, 4H, -OCH<sub>2</sub>), 1.76 (m, 4H, -OCH<sub>2</sub>CH<sub>2</sub>), 1.40 (m, 12H, -[CH<sub>2</sub>]<sub>6</sub>), 0.91 (t,  $J_1(\text{H,H})=6.3$  Hz, 6H, -CH<sub>3</sub>);  $^{13}\text{C}$  NMR (75 MHz, DMSO- $d_6$ , 60°C):  $\delta_c$  176.95, 161.35, 160.22, 154.15, 147.09, 130.17, 130.09, 128.36, 127.98, 126.69, 121.42, 119.98, 115.35, 114.50, 67.52, 30.65, 28.10, 24.85, 21.37, 13.07; Elemental analyses: calculated for C<sub>33</sub>H<sub>41</sub>N<sub>3</sub>O<sub>3</sub> (%), C, 75.11; H, 7.83; N, 7.96; Found, C, 75.01; H, 7.78; N, 7.92.

### 2.3 Synthesis of *N*-(4-(heptyloxy)benzylidene)-4-*l*-(4'-(heptyloxy)benzylidene)amino}benzohydrazide (*l*, *n*=7)

Yield: 79 %. IR (KBr,  $\text{cm}^{-1}$ ): 3286  $\nu_s$  (N-H), 2920, 2851 (aliphatic C-H), 1650 (amide-I, C=O), 1576 (amide-II, N-H), 1628 (-C=N), 1610, 1513 (Ph), 1305, 1251 (OPh), 1028 (N-N);  $^1\text{H}$  NMR (300 MHz, DMSO- $d_6$ , 60°C):  $\delta$  11.45 (s, 1H, -NH), 8.56 (s, 1H, -CH=N), 8.40 (s, 1H, -CH=N), 7.96 (dd,  $J_1(\text{H,H})=8.1$  Hz,  $J_2(\text{H,H})=8.7$  Hz, 4H, -C<sub>6</sub>H<sub>4</sub>), 7.65 (d,  $J_1(\text{H,H})=8.1$  Hz, 2H, -C<sub>6</sub>H<sub>4</sub>), 7.30 (d,  $J_1(\text{H,H})=8.4$  Hz, 2H, -C<sub>6</sub>H<sub>4</sub>), 7.08 (dd,  $J_1(\text{H,H})=8.7$  Hz,  $J_2(\text{H,H})=8.7$  Hz, 4H, -C<sub>6</sub>H<sub>4</sub>), 4.09 (m, 4H,  $J_1(\text{H,H})=6.3$  Hz, -OCH<sub>2</sub>), 1.76 (m, 4H, -OCH<sub>2</sub>CH<sub>2</sub>), 1.40 (m, 16H, -[CH<sub>2</sub>]<sub>8</sub>), 0.90 (t,  $J_1(\text{H,H})=6.3$  Hz, 6H, -CH<sub>3</sub>);  $^{13}\text{C}$  NMR (75 MHz, DMSO- $d_6$ , 60°C):  $\delta_c$  176.94, 161.35, 160.21, 154.15, 147.10, 130.18, 130.09, 128.37, 127.98, 126.69, 121.42, 119.99, 115.35, 114.50, 67.52, 30.64, 28.10, 24.86, 21.37, 13.07; Elemental analyses: calculated for C<sub>35</sub>H<sub>45</sub>N<sub>3</sub>O<sub>3</sub> (%), C, 75.64; H, 8.16; N, 7.56; Found, C, 75.58; H, 8.09; N, 7.49.

### 2.4 Synthesis of *N*-(4-(octyloxy)benzylidene)-4-*l*-(4'-(octyloxy)benzylidene)amino}benzohydrazide (*l*, *n*=8)

Yield: 83 %. IR (KBr,  $\text{cm}^{-1}$ ): 3285  $\nu_s$  (N-H), 2920, 2853 (aliphatic C-H), 1648 (amide-I, C=O), 1578 (amide-II, N-H), 1630 (-C=N), 1610, 1512 (Ph), 1304, 1251 (OPh), 1029 (N-N);  $^1\text{H}$  NMR (300 MHz, DMSO- $d_6$ , 60°C):  $\delta$  11.50 (s, 1H, -NH), 8.55 (s, 1H, -CH=N), 8.39 (s, 1H, -CH=N), 7.97 (dd,  $J_1(\text{H,H})=8.1$  Hz,  $J_2(\text{H,H})=8.7$  Hz, 4H, -C<sub>6</sub>H<sub>4</sub>), 7.65 (d,  $J_1(\text{H,H})=8.1$  Hz, 2H, -C<sub>6</sub>H<sub>4</sub>), 7.30 (d,  $J_1(\text{H,H})=8.4$  Hz, 2H, -C<sub>6</sub>H<sub>4</sub>), 7.10 (dd,  $J_1(\text{H,H})=8.7$  Hz,  $J_2(\text{H,H})=8.7$  Hz, 4H, -C<sub>6</sub>H<sub>4</sub>), 4.08 (m, 4H, -OCH<sub>2</sub>), 1.76 (m, 4H, -OCH<sub>2</sub>CH<sub>2</sub>), 1.41 (m, 20H, -[CH<sub>2</sub>]<sub>10</sub>), 0.93 (t,  $J_1(\text{H,H})=6.3$  Hz, 6H, -CH<sub>3</sub>);  $^{13}\text{C}$  NMR (75 MHz, DMSO- $d_6$ , 60°C):  $\delta_c$  176.96, 161.34, 160.21, 154.16, 147.10, 130.18, 130.10, 128.37, 127.99, 126.69, 121.43, 119.99, 115.37, 114.48, 67.52, 30.64, 28.08, 24.87, 21.37,

13.08; Elemental analyses: calculated for C<sub>37</sub>H<sub>49</sub>N<sub>3</sub>O<sub>3</sub> (%), C, 76.12; H, 8.46; N, 7.20; Found, C, 76.01; H, 8.37; N, 7.18.

#### 2.5 Synthesis of *N*-(4-(decyloxy)benzylidene)-4-*l*-(4'-(decyloxy)benzylidene)amino}benzohydrazide (*l*, *n*=10)

Yield: 85 %. IR (KBr, cm<sup>-1</sup>): 3288  $\nu_s$  (N-H), 2918, 2851 (aliphatic C-H), 1650 (amide-I, C=O), 1578 (amide-II, N-H), 1628 (-C=N), 1609, 1510 (Ph), 1303, 1253 (OPh), 1029 (N-N); <sup>1</sup>H NMR (300 MHz, DMSO-d<sub>6</sub>, 60°C):  $\delta$  11.31 (s, 1H, -NH), 8.54 (s, 1H, -CH=N), 8.40 (s, 1H, -CH=N), 7.96 (dd, J<sub>1</sub>(H,H)=8.1 Hz, J<sub>2</sub>(H,H)=8.7 Hz, 4H, -C<sub>6</sub>H<sub>4</sub>), 7.64 (d, J(H,H)=8.1 Hz, 2H, -C<sub>6</sub>H<sub>4</sub>), 7.29 (d, J(H,H)=8.4 Hz, 2H, -C<sub>6</sub>H<sub>4</sub>), 7.06 (dd, J<sub>1</sub>(H,H)=8.7 Hz, J<sub>2</sub>(H,H)=8.7 Hz, 4H, -C<sub>6</sub>H<sub>4</sub>), 4.08 (m, 4H, -OCH<sub>2</sub>), 1.78 (m, 4H, -OCH<sub>2</sub>CH<sub>2</sub>), 1.42-1.28 (m, 28H, -[CH<sub>2</sub>]<sub>14</sub>), 0.87 (t, J(H,H)=6.3 Hz, 6H, -CH<sub>3</sub>); <sup>13</sup>C NMR (75 MHz, DMSO-d<sub>6</sub>, 60°C):  $\delta_c$  176.95, 161.34, 160.22, 154.14, 147.09, 130.17, 130.08, 128.36, 127.98, 126.68, 121.42, 119.98, 115.35, 114.55, 114.49, 67.52, 30.64, 28.08, 24.87, 21.37, 13.08; Elemental analyses: calculated for C<sub>41</sub>H<sub>57</sub>N<sub>3</sub>O<sub>3</sub> (%), C, 76.95; H, 8.98; N, 6.57; Found, C, 76.88; H, 8.89; N, 6.53.

#### 2.6 Synthesis of *N*-(4-(dodecyloxy)benzylidene)-4-*l*-(4'-(dodecyloxy)benzylidene)amino}benzohydrazide (*l*, *n*=12)

Yield: 81 %. IR (KBr, cm<sup>-1</sup>): 3284  $\nu_s$  (N-H), 2917, 2850 (aliphatic C-H), 1650 (amide-I, C=O), 1576 (amide-II, N-H), 1628 (-C=N), 1611, 1512 (Ph), 1303, 1252 (OPh), 1028 (N-N); <sup>1</sup>H NMR (300 MHz, DMSO-d<sub>6</sub>, 60°C):  $\delta$  11.44 (s, 1H, -NH), 8.56 (s, 1H, -CH=N), 8.40 (s, 1H, -CH=N), 7.96 (dd, J<sub>1</sub>(H,H)=8.1 Hz, J<sub>2</sub>(H,H)=8.7 Hz, 4H, -C<sub>6</sub>H<sub>4</sub>), 7.64 (d, J(H,H)=8.1 Hz, 2H, -C<sub>6</sub>H<sub>4</sub>), 7.30 (d, J(H,H)=8.4 Hz, 2H, -C<sub>6</sub>H<sub>4</sub>), 7.08 (dd, J<sub>1</sub>(H,H)=8.7 Hz, J<sub>2</sub>(H,H)=8.7 Hz, 4H, -C<sub>6</sub>H<sub>4</sub>), 4.09 (m, 4H, -OCH<sub>2</sub>), 1.78 (m, 4H, -OCH<sub>2</sub>CH<sub>2</sub>), 1.41-1.28 (m, 36H, -[CH<sub>2</sub>]<sub>18</sub>), 0.89 (t, J(H,H)=6.3 Hz, 6H, -CH<sub>3</sub>); <sup>13</sup>C NMR (75 MHz, DMSO-d<sub>6</sub>, 60°C):  $\delta_c$  176.97, 161.35, 160.20, 154.16, 147.10, 130.18, 130.10, 128.37, 127.96, 126.69, 121.43, 119.97, 115.36, 114.51, 114.48, 67.52, 30.64, 28.10, 24.87, 21.37, 13.09; Elemental analyses: calculated for C<sub>45</sub>H<sub>65</sub>N<sub>3</sub>O<sub>3</sub> (%), C, 77.65; H, 9.41; N, 6.04; Found, C, 77.57; H, 9.38; N, 5.99.

#### 2.7 Synthesis of *N*-(4-(tetradecyloxy)benzylidene)-4-*l*-(4'-(tetradecyloxy)benzylidene)amino}benzohydrazide (*l*, *n*=14)

Yield: 78 %. IR (KBr, cm<sup>-1</sup>): 3287  $\nu_s$  (N-H), 2919, 2851 (aliphatic C-H), 1648 (amide-I, C=O), 1580 (amide-II, N-H), 1630 (-C=N), 1612, 1509 (Ph), 1305, 1255 (OPh), 1027 (N-N); <sup>1</sup>H NMR (300 MHz, DMSO-d<sub>6</sub>, 60°C):  $\delta$  11.46 (s, 1H, -NH), 8.55 (s, 1H, -CH=N), 8.39 (s, 1H, -CH=N), 7.97 (dd, J<sub>1</sub>(H,H)=8.1 Hz, J<sub>2</sub>(H,H)=8.7 Hz, 4H, -C<sub>6</sub>H<sub>4</sub>), 7.67 (d, J(H,H)=8.1 Hz, 2H, -C<sub>6</sub>H<sub>4</sub>), 7.30 (d, J(H,H)=8.4 Hz, 2H, -C<sub>6</sub>H<sub>4</sub>), 7.08 (dd, J<sub>1</sub>(H,H)=8.7 Hz, J<sub>2</sub>(H,H)=8.7 Hz, 4H, -C<sub>6</sub>H<sub>4</sub>), 4.07 (m, 4H, -OCH<sub>2</sub>), 1.77 (m, 4H, -OCH<sub>2</sub>CH<sub>2</sub>), 1.42-1.29 (m, 44H, -[CH<sub>2</sub>]<sub>22</sub>), 0.90 (t, J(H,H)=6.3 Hz, 6H, -CH<sub>3</sub>); <sup>13</sup>C NMR (75 MHz, DMSO-d<sub>6</sub>, 60°C):  $\delta_c$  176.97, 161.36, 160.20, 154.13, 147.10, 130.18, 130.10, 128.37, 127.99, 126.69, 121.43, 119.97, 115.35, 114.47, 67.55, 30.64, 28.10, 24.87, 21.37, 13.09; Elemental analyses: calculated for C<sub>49</sub>H<sub>73</sub>N<sub>3</sub>O<sub>3</sub> (%), C, 78.25; H, 9.78; N, 5.59; Found, C, 78.17; H, 9.69; N, 5.52.

#### 2.8 Synthesis of *N*-(4-(hexadecyloxy)benzylidene)-4-*l*-(4'-(hexadecyloxy)benzylidene)amino}benzohydrazide (*l*, *n*=16)

Yield: 79 %. IR (KBr, cm<sup>-1</sup>): 3285  $\nu_s$  (N-H), 2918, 2852 (aliphatic C-H), 1648 (amide-I, C=O), 1579 (amide-II, N-H), 1628 (-C=N), 1610, 1511 (Ph), 1304, 1254 (OPh), 1028 (N-N); <sup>1</sup>H NMR (300 MHz, DMSO-d<sub>6</sub>, 60°C):  $\delta$

11.48 (s, 1H, -NH), 8.56 (s, 1H, -CH=N), 8.40 (s, 1H, -CH=N), 7.97 (dd,  $J_1(\text{H,H})=8.1$  Hz,  $J_2(\text{H,H})=8.7$  Hz, 4H, -C<sub>6</sub>H<sub>4</sub>), 7.67 (d,  $J(\text{H,H})=8.1$  Hz, 2H, -C<sub>6</sub>H<sub>4</sub>), 7.30 (d,  $J(\text{H,H})=8.4$  Hz, 2H, -C<sub>6</sub>H<sub>4</sub>), 7.10 (dd,  $J_1(\text{H,H})=8.7$  Hz,  $J_2(\text{H,H})=8.7$  Hz, 4H, -C<sub>6</sub>H<sub>4</sub>), 4.07 (m, 4H, -OCH<sub>2</sub>), 1.78 (m, 4H, -OCH<sub>2</sub>CH<sub>2</sub>), 1.41-1.28 (m, 52H, -[CH<sub>2</sub>]<sub>26</sub>), 0.91 (t,  $J(\text{H,H})=6.3$  Hz, 6H, -CH<sub>3</sub>); <sup>13</sup>C NMR (75 MHz, DMSO-d<sub>6</sub>, 60°C): δ<sub>c</sub> 176.97, 161.36, 160.21, 154.16, 147.10, 130.18, 130.10, 128.39, 127.99, 126.69, 121.45, 119.97, 115.35, 114.47, 67.55, 30.67, 28.10, 24.84, 21.37, 13.08; Elemental analyses: calculated for C<sub>53</sub>H<sub>81</sub>N<sub>3</sub>O<sub>3</sub> (%), C, 78.76; H, 10.10; N, 5.20; Found, C, 78.73; H, 10.01; N, 5.15.

*2.9 Synthesis of N-(3,4-bis(pentyloxy)benzylidene)-4-((3',4'-bis(pentyloxy)benzylidene) amino)benzohydrazide (2, n=5)*

Yield: 77 %. IR (KBr, cm<sup>-1</sup>): 3208 ν<sub>s</sub> (N-H), 2920, 2850 (aliphatic C-H), 1641 (amide-I, C=O), 1576 (amide-II, N-H), 1624 (-C=N), 1599, 1513 (Ph), 1303, 1273 (OPh), 1021 (N-N); <sup>1</sup>H NMR (300 MHz, CDCl<sub>3</sub>/DMSO-d<sub>6</sub>, 30°C): δ 11.15 (s, 1H, -NH), 8.48 (s, 1H, -CH=N), 8.36 (s, 1H, -CH=N), 7.94 (d,  $J_1(\text{H,H})=8.4$  Hz, 2H, -C<sub>6</sub>H<sub>4</sub>), 7.55 (s, 2H, -C<sub>6</sub>H<sub>3</sub>), 7.46 (d,  $J_1(\text{H,H})=8.4$  Hz, 2H, -C<sub>6</sub>H<sub>4</sub>), 7.30 (dd,  $J_1(\text{H,H})=9.0$  Hz,  $J_2(\text{H,H})=8.1$  Hz, 2H, -C<sub>6</sub>H<sub>3</sub>), 7.08 (dd,  $J_1(\text{H,H})=8.4$  Hz,  $J_2(\text{H,H})=8.1$  Hz, 2H, -C<sub>6</sub>H<sub>3</sub>), 4.08 (m, 8H,  $J_1(\text{H,H})=6.3$  Hz, -OCH<sub>2</sub>), 1.78 (m, 8H, -OCH<sub>2</sub>CH<sub>2</sub>), 1.45-1.27 (m, 16H, -[CH<sub>2</sub>]<sub>8</sub>), 0.84 (t,  $J_1(\text{H,H})=6.3$  Hz, 12H, -CH<sub>3</sub>); <sup>13</sup>C NMR (75 MHz, CDCl<sub>3</sub>, 40°C): δ<sub>c</sub> 164.70, 160.61, 154.57, 152.38, 151.85, 151.83, 149.43, 129.60, 129.09, 124.59, 120.51, 112.16, 110.98, 110.96, 105.47, 69.13, 68.70, 31.91, 29.61, 29.35, 25.98, 22.69, 14.13; Elemental analyses: calculated for C<sub>41</sub>H<sub>57</sub>N<sub>3</sub>O<sub>5</sub> (%), C, 73.29; H, 8.55; N, 6.25; Found, C, 73.21; H, 8.51; N, 6.20.

*2.10 Synthesis of N-(3,4-bis(hexyloxy)benzylidene)-4-((3',4'-bis(hexyloxy)benzylidene) amino)benzohydrazide (2, n=6)*

Yield: 79 %. IR (KBr, cm<sup>-1</sup>): 3206 ν<sub>s</sub> (N-H), 2921, 2850 (aliphatic C-H), 1640 (amide-I, C=O), 1578 (amide-II, N-H), 1626 (-C=N), 1600, 1515 (Ph), 1303, 1273 (OPh), 1020 (N-N); <sup>1</sup>H NMR (300 MHz, CDCl<sub>3</sub>/DMSO-d<sub>6</sub>, 30°C): δ 11.15 (s, 1H, -NH), 8.47 (s, 1H, -CH=N), 8.36 (s, 1H, -CH=N), 7.95 (d,  $J_1(\text{H,H})=8.4$  Hz, 2H, -C<sub>6</sub>H<sub>4</sub>), 7.55 (s, 2H, -C<sub>6</sub>H<sub>3</sub>), 7.47 (d,  $J_1(\text{H,H})=8.4$  Hz, 2H, -C<sub>6</sub>H<sub>4</sub>), 7.30 (dd,  $J_1(\text{H,H})=9.0$  Hz,  $J_2(\text{H,H})=8.1$  Hz, 2H, -C<sub>6</sub>H<sub>3</sub>), 7.08 (dd,  $J_1(\text{H,H})=8.4$  Hz,  $J_2(\text{H,H})=8.1$  Hz, 2H, -C<sub>6</sub>H<sub>3</sub>), 4.09 (m, 8H,  $J_1(\text{H,H})=6.3$  Hz, -OCH<sub>2</sub>), 1.78 (m, 8H, -OCH<sub>2</sub>CH<sub>2</sub>), 1.46-1.27 (m, 24H, -[CH<sub>2</sub>]<sub>12</sub>), 0.84 (t,  $J_1(\text{H,H})=6.3$  Hz, 12H, -CH<sub>3</sub>); <sup>13</sup>C NMR (75 MHz, CDCl<sub>3</sub>, 40°C): δ<sub>c</sub> 164.70, 160.62, 154.56, 152.39, 151.82, 151.83, 149.41, 129.59, 129.09, 124.59, 120.52, 112.17, 110.99, 110.94, 105.47, 69.12, 68.71, 31.91, 29.61, 29.35, 25.98, 22.69, 14.13; Elemental analyses: calculated for C<sub>45</sub>H<sub>65</sub>N<sub>3</sub>O<sub>5</sub> (%), C, 74.24; H, 9.01; N, 5.77; Found, C, 74.13; H, 8.91; N, 5.69.

*2.11 Synthesis of N-(3,4-bis(heptyloxy)benzylidene)-4-((3',4'-bis(heptyloxy)benzylidene) amino)benzohydrazide (2, n=7)*

Yield: 80 %. IR (KBr, cm<sup>-1</sup>): 3210 ν<sub>s</sub> (N-H), 2920, 2852 (aliphatic C-H), 1642 (amide-I, C=O), 1580 (amide-II, N-H), 1625 (-C=N), 1598, 1515 (Ph), 1305, 1273 (OPh), 1020 (N-N); <sup>1</sup>H NMR (300 MHz, CDCl<sub>3</sub>/DMSO-d<sub>6</sub>, 30°C): δ 11.12 (s, 1H, -NH), 8.47 (s, 1H, -CH=N), 8.34 (s, 1H, -CH=N), 7.95 (d,  $J_1(\text{H,H})=8.4$  Hz, 2H, -C<sub>6</sub>H<sub>4</sub>), 7.55 (s, 2H, -C<sub>6</sub>H<sub>3</sub>), 7.47 (d,  $J_1(\text{H,H})=8.4$  Hz, 2H, -C<sub>6</sub>H<sub>4</sub>), 7.31 (dd,  $J_1(\text{H,H})=9.0$  Hz,  $J_2(\text{H,H})=8.1$  Hz, 2H, -C<sub>6</sub>H<sub>3</sub>), 7.08 (dd,  $J_1(\text{H,H})=8.4$  Hz,  $J_2(\text{H,H})=8.1$  Hz, 2H, -C<sub>6</sub>H<sub>3</sub>), 4.09 (m, 8H,  $J_1(\text{H,H})=6.3$  Hz, -OCH<sub>2</sub>), 1.78 (m, 8H, -OCH<sub>2</sub>CH<sub>2</sub>), 1.46-1.27 (m, 32H, -[CH<sub>2</sub>]<sub>16</sub>), 0.83 (t,  $J_1(\text{H,H})=6.3$  Hz, 12H, -CH<sub>3</sub>); <sup>13</sup>C NMR (75 MHz, CDCl<sub>3</sub>, 40°C): δ<sub>c</sub> 164.71, 160.62, 154.57, 152.37, 151.83, 149.41, 129.60, 129.09, 124.57, 120.52, 112.16, 110.99,

110.96, 105.47, 69.12, 68.70, 31.91, 29.61, 29.35, 25.98, 22.69, 14.13; Elemental analyses: calculated for  $C_{49}H_{73}N_3O_5$  (%), C, 75.06; H, 9.38; N, 5.36; Found, C, 74.96; H, 9.33; N, 5.31.

*2.12 Synthesis of N-(3,4-bis(octyloxy)benzylidene)-4-((3',4'-bis(octyloxy)benzylidene)amino)benzohydrazide (2, n=8)*

Yield: 76 %. IR (KBr,  $cm^{-1}$ ): 3208  $\nu_s$  (N-H), 2922, 2850 (aliphatic C-H), 1644 (amide-I, C=O), 1577 (amide-II, N-H), 1626 (-C=N), 1598, 1515 (Ph), 1304, 1275 (OPh), 1020 (N-N);  $^1H$  NMR (300 MHz,  $CDCl_3/DMSO-d_6$ , 30°C):  $\delta$  11.13 (s, 1H, -NH), 8.50 (s, 1H, -CH=N), 8.34 (s, 1H, -CH=N), 7.93 (d,  $J(H,H)=8.4$  Hz, 2H, -C<sub>6</sub>H<sub>4</sub>), 7.55 (s, 2H, -C<sub>6</sub>H<sub>3</sub>), 7.47 (d,  $J(H,H)=8.4$  Hz, 2H, -C<sub>6</sub>H<sub>4</sub>), 7.31 (dd,  $J_1(H,H)=9.0$  Hz,  $J_2(H,H)=8.1$  Hz, 2H, -C<sub>6</sub>H<sub>3</sub>), 7.09 (dd,  $J_1(H,H)=8.4$  Hz,  $J_2(H,H)=8.1$  Hz, 2H, -C<sub>6</sub>H<sub>3</sub>), 4.09 (m, 8H, -OCH<sub>2</sub>), 1.78 (m, 8H, -OCH<sub>2</sub>CH<sub>2</sub>), 1.45-1.26 (m, 40H, -[CH<sub>2</sub>]<sub>20</sub>), 0.83 (t,  $J(H,H)=6.3$  Hz, 12H, -CH<sub>3</sub>);  $^{13}C$  NMR (75 MHz,  $CDCl_3$ , 40°C):  $\delta_c$  164.70, 160.63, 154.57, 152.39, 151.83, 149.41, 129.57, 129.09, 124.58, 120.53, 112.16, 110.99, 110.94, 105.47, 69.11, 68.70, 31.92, 29.61, 29.35, 25.98, 22.69, 14.13; Elemental analyses: calculated for  $C_{53}H_{81}N_3O_5$  (%), C, 75.76; H, 9.72; N, 5.00; Found, C, 75.68; H, 9.68; N, 4.96.

*2.13 Synthesis of N-(3,4-bis(decyloxy)benzylidene)-4-((3',4'-bis(decyloxy)benzylidene)amino)benzohydrazide (2, n=10)*

Yield: 82 %. IR (KBr,  $cm^{-1}$ ): 3204  $\nu_s$  (N-H), 2920, 2850 (aliphatic C-H), 1640 (amide-I, C=O), 1576 (amide-II, N-H), 1624 (-C=N), 1597, 1513 (Ph), 1303, 1273 (OPh), 1020 (N-N);  $^1H$  NMR (300 MHz,  $CDCl_3/DMSO-d_6$ , 30°C):  $\delta$  11.15 (s, 1H, -NH), 8.48 (s, 1H, -CH=N), 8.35 (s, 1H, -CH=N), 7.94 (d,  $J(H,H)=8.4$  Hz, 2H, -C<sub>6</sub>H<sub>4</sub>), 7.54 (s, 2H, -C<sub>6</sub>H<sub>3</sub>), 7.46 (d,  $J(H,H)=8.4$  Hz, 2H, -C<sub>6</sub>H<sub>4</sub>), 7.30 (dd,  $J_1(H,H)=9.0$  Hz,  $J_2(H,H)=8.1$  Hz, 2H, -C<sub>6</sub>H<sub>3</sub>), 7.07 (dd,  $J_1(H,H)=8.4$  Hz,  $J_2(H,H)=8.1$  Hz, 2H, -C<sub>6</sub>H<sub>3</sub>), 4.08 (m, 8H, -OCH<sub>2</sub>), 1.77 (m, 8H, -OCH<sub>2</sub>CH<sub>2</sub>), 1.45-1.27 (m, 56H, -[CH<sub>2</sub>]<sub>28</sub>), 0.85 (t,  $J(H,H)=6.3$  Hz, 12H, -CH<sub>3</sub>);  $^{13}C$  NMR (75 MHz,  $CDCl_3$ , 40°C):  $\delta_c$  164.70, 160.62, 154.57, 152.38, 151.84, 151.83, 149.41, 129.60, 129.09, 124.58, 120.52, 112.16, 110.99, 110.96, 105.47, 69.12, 68.70, 31.91, 29.61, 29.35, 25.98, 22.69, 14.13; Elemental analyses: calculated for  $C_{61}H_{97}N_3O_5$  (%), C, 76.92; H, 10.27; N, 4.41; Found, C, 76.81; H, 10.19; N, 4.38.

*2.14 Synthesis of N-(3,4-bis(dodecyloxy)benzylidene)-4-((3',4'-bis(dodecyloxy)benzylidene)amino)benzohydrazide (2, n=12)*

Yield: 81 %. IR (KBr,  $cm^{-1}$ ): 3212  $\nu_s$  (N-H), 2922, 2854 (aliphatic C-H), 1640 (amide-I, C=O), 1577 (amide-II, N-H), 1624 (-C=N), 1598, 1515 (Ph), 1305, 1275 (OPh), 1021 (N-N);  $^1H$  NMR (300 MHz,  $CDCl_3/DMSO-d_6$ , 30°C):  $\delta$  11.15 (s, 1H, -NH), 8.48 (s, 1H, -CH=N), 8.37 (s, 1H, -CH=N), 7.96 (d,  $J(H,H)=8.4$  Hz, 2H, -C<sub>6</sub>H<sub>4</sub>), 7.52 (s, 2H, -C<sub>6</sub>H<sub>3</sub>), 7.46 (d,  $J(H,H)=8.4$  Hz, 2H, -C<sub>6</sub>H<sub>4</sub>), 7.30 (dd,  $J_1(H,H)=9.0$  Hz,  $J_2(H,H)=8.1$  Hz, 2H, -C<sub>6</sub>H<sub>3</sub>), 7.07 (dd,  $J_1(H,H)=8.4$  Hz,  $J_2(H,H)=8.1$  Hz, 2H, -C<sub>6</sub>H<sub>3</sub>), 4.07 (m, 8H, -OCH<sub>2</sub>), 1.77 (m, 8H, -OCH<sub>2</sub>CH<sub>2</sub>), 1.45-1.27 (m, 72H, -[CH<sub>2</sub>]<sub>36</sub>), 0.85 (t,  $J(H,H)=6.3$  Hz, 12H, -CH<sub>3</sub>);  $^{13}C$  NMR (75 MHz,  $CDCl_3$ , 40°C):  $\delta_c$  164.69, 160.62, 154.58, 152.38, 151.84, 151.83, 149.41, 129.60, 129.10, 124.57, 120.52, 112.16, 110.97, 110.96, 105.48, 69.12, 68.70, 31.91, 29.61, 29.35, 25.98, 22.69, 14.13; Elemental analyses: calculated for  $C_{69}H_{113}N_3O_5$  (%), C, 77.84; H, 10.70; N, 3.95; Found, C, 77.76; H, 10.61; N, 3.87.

*2.15 Synthesis of N-(3,4-bis(tetradecyloxy)benzylidene)-4-((3',4'-bis(tetradecyloxy)benzylidene)amino)benzohydrazide (2, n=14)*

Yield: 78 %. IR (KBr,  $\text{cm}^{-1}$ ): 3206  $\nu_s$  (N-H), 2920, 2852 (aliphatic C-H), 1641 (amide-I, C=O), 1577 (amide-II, N-H), 1625 (-C=N), 1598, 1514 (Ph), 1304, 1278 (OPh), 1023 (N-N);  $^1\text{H}$  NMR (300 MHz,  $\text{CDCl}_3/\text{DMSO-d}_6$ ,  $30^\circ\text{C}$ ):  $\delta$  11.17 (s, 1H, -NH), 8.48 (s, 1H, -CH=N), 8.35 (s, 1H, -CH=N), 7.94 (d,  $J(\text{H,H})=8.4$  Hz, 2H, - $\text{C}_6\text{H}_4$ ), 7.51 (s, 2H, - $\text{C}_6\text{H}_3$ ), 7.45 (d,  $J(\text{H,H})=8.4$  Hz, 2H, - $\text{C}_6\text{H}_4$ ), 7.32 (dd,  $J_1(\text{H,H})=9.0$  Hz,  $J_2(\text{H,H})=8.1$  Hz, 2H, - $\text{C}_6\text{H}_3$ ), 7.07 (dd,  $J_1(\text{H,H})=8.4$  Hz,  $J_2(\text{H,H})=8.1$  Hz, 2H, - $\text{C}_6\text{H}_3$ ), 4.09 (m, 8H, - $\text{OCH}_2$ ), 1.77 (m, 8H, - $\text{OCH}_2\text{CH}_2$ ), 1.45-1.27 (m, 88H, - $[\text{CH}_2]_{44}$ ), 0.86 (t,  $J(\text{H,H})=6.3$  Hz, 12H, - $\text{CH}_3$ );  $^{13}\text{C}$  NMR (75 MHz,  $\text{CDCl}_3$ ,  $40^\circ\text{C}$ ):  $\delta_c$  164.70, 160.64, 154.57, 152.38, 151.84, 151.83, 149.41, 129.58, 129.09, 124.58, 120.52, 112.15, 110.99, 110.96, 105.47, 69.11, 68.70, 31.91, 29.61, 29.35, 25.98, 22.69, 14.14; Elemental analyses: calculated for  $\text{C}_{77}\text{H}_{129}\text{N}_3\text{O}_5$  (%), C, 78.58; H, 11.05; N, 3.57; Found, C, 78.53; H, 10.97; N, 3.53.

*2.16 Synthesis of N-(3,4-bis(hexadecyloxy)benzylidene)-4-((3',4'-bis(hexadecyloxy)benzylidene)amino)benzohydrazide (2, n=16)*

Yield: 76 %. IR (KBr,  $\text{cm}^{-1}$ ): 3207  $\nu_s$  (N-H), 2921, 2854 (aliphatic C-H), 1643 (amide-I, C=O), 1578 (amide-II, N-H), 1624 (-C=N), 1601, 1515 (Ph), 1305, 1280 (OPh), 1021 (N-N);  $^1\text{H}$  NMR (300 MHz,  $\text{CDCl}_3/\text{DMSO-d}_6$ ,  $30^\circ\text{C}$ ):  $\delta$  11.15 (s, 1H, -NH), 8.50 (s, 1H, -CH=N), 8.35 (s, 1H, -CH=N), 7.93 (d,  $J(\text{H,H})=8.4$  Hz, 2H, - $\text{C}_6\text{H}_4$ ), 7.54 (s, 2H, - $\text{C}_6\text{H}_3$ ), 7.47 (d,  $J(\text{H,H})=8.4$  Hz, 2H, - $\text{C}_6\text{H}_4$ ), 7.30 (dd,  $J_1(\text{H,H})=9.0$  Hz,  $J_2(\text{H,H})=8.1$  Hz, 2H, - $\text{C}_6\text{H}_3$ ), 7.10 (dd,  $J_1(\text{H,H})=8.4$  Hz,  $J_2(\text{H,H})=8.1$  Hz, 2H, - $\text{C}_6\text{H}_3$ ), 4.06 (m, 8H, - $\text{OCH}_2$ ), 1.78 (m, 8H, - $\text{OCH}_2\text{CH}_2$ ), 1.47-1.25 (m, 104H, - $[\text{CH}_2]_{52}$ ), 0.87 (t,  $J(\text{H,H})=6.3$  Hz, 12H, - $\text{CH}_3$ );  $^{13}\text{C}$  NMR (75 MHz,  $\text{CDCl}_3$ ,  $40^\circ\text{C}$ ):  $\delta_c$  164.71, 160.62, 154.57, 152.39, 151.84, 151.83, 149.41, 129.59, 129.09, 124.58, 120.53, 112.16, 110.99, 110.96, 105.47, 69.11, 68.70, 31.91, 29.62, 29.35, 25.99, 22.69, 14.13; Elemental analyses: calculated for  $\text{C}_{85}\text{H}_{145}\text{N}_3\text{O}_5$  (%), C, 79.20; H, 11.34; N, 3.26; Found, C, 79.11; H, 11.28; N, 3.19.

*2.17 Synthesis of N-(3,5-bis(pentyloxy)benzylidene)-4-((3',5'-bis(pentyloxy)benzylidene)amino)benzohydrazide (3, n=5)*

Yield: 83 %. IR (KBr,  $\text{cm}^{-1}$ ): 3220  $\nu_s$  (N-H), 2926, 2856 (aliphatic C-H), 1647 (amide-I, C=O), 1572 (amide-II, N-H), 1623 (-C=N), 1601, 1518 (Ph), 1309, 1278 (OPh), 1026 (N-N);  $^1\text{H}$  NMR (300 MHz,  $\text{CDCl}_3$ ,  $40^\circ\text{C}$ ):  $\delta$  9.35 (s, 1H, -NH), 8.30 (s, 1H, -CH=N), 7.94 (s, 1H, -CH=N), 7.21 (d,  $J(\text{H,H})=8.4$  Hz, 2H, - $\text{C}_6\text{H}_4$ ), 6.98 (d,  $J(\text{H,H})=8.4$  Hz, 2H, - $\text{C}_6\text{H}_4$ ), 6.84 (s, 4H, - $\text{C}_6\text{H}_3$ ), 6.48 (s, 2H, - $\text{C}_6\text{H}_3$ ), 4.03 (m, 8H, - $\text{OCH}_2$ ), 1.83 (m, 8H, - $\text{OCH}_2\text{CH}_2$ ), 1.45-1.27 (m, 16H, - $[\text{CH}_2]_8$ ), 0.90 (t,  $J(\text{H,H})=6.3$  Hz, 12H, - $\text{CH}_3$ );  $^{13}\text{C}$  NMR (75 MHz,  $\text{CDCl}_3$ ,  $40^\circ\text{C}$ ):  $\delta_c$  160.98, 159.12, 156.28, 147.11, 140.84, 130.33, 129.29, 128.35, 123.47, 114.57, 114.05, 107.71, 68.70, 68.06, 31.93, 30.34, 29.69, 29.39, 26.06, 22.68, 14.13; Elemental analyses: calculated for  $\text{C}_{41}\text{H}_{57}\text{N}_3\text{O}_5$  (%), C, 73.29; H, 8.55; N, 6.25; Found, C, 73.18; H, 8.51; N, 6.27.

*2.18 Synthesis of N-(3,5-bis(hexyloxy)benzylidene)-4-((3',5'-bis(hexyloxy)benzylidene)amino)benzohydrazide (3, n=6)*

Yield: 78 %. IR (KBr,  $\text{cm}^{-1}$ ): 3220  $\nu_s$  (N-H), 2924, 2856 (aliphatic C-H), 1648 (amide-I, C=O), 1572 (amide-II, N-H), 1624 (-C=N), 1601, 1518 (Ph), 1310, 1278 (OPh), 1026 (N-N);  $^1\text{H}$  NMR (300 MHz,  $\text{CDCl}_3$ ,  $40^\circ\text{C}$ ):  $\delta$  9.34 (s, 1H, -NH), 8.28 (s, 1H, -CH=N), 7.95 (s, 1H, -CH=N), 7.21 (d,  $J(\text{H,H})=8.4$  Hz, 2H, - $\text{C}_6\text{H}_4$ ), 6.98 (d,  $J(\text{H,H})=8.4$  Hz, 2H, - $\text{C}_6\text{H}_4$ ), 6.83 (s, 4H, - $\text{C}_6\text{H}_3$ ), 6.49 (s, 2H, - $\text{C}_6\text{H}_3$ ), 4.02 (m, 8H, - $\text{OCH}_2$ ), 1.83 (m, 8H, - $\text{OCH}_2\text{CH}_2$ ), 1.45-1.27 (m, 24H, - $[\text{CH}_2]_{12}$ ), 0.91 (t,  $J(\text{H,H})=6.3$  Hz, 12H, - $\text{CH}_3$ );  $^{13}\text{C}$  NMR (75 MHz,  $\text{CDCl}_3$ ,  $40^\circ\text{C}$ ):  $\delta_c$  160.95, 159.10, 156.27, 147.13, 140.84, 130.31, 129.28, 128.35, 123.49, 114.55, 114.05, 107.70,

68.72, 68.06, 31.93, 30.34, 29.68, 29.39, 26.08, 22.68, 14.10; Elemental analyses: calculated for C<sub>45</sub>H<sub>65</sub>N<sub>3</sub>O<sub>5</sub> (%), C, 74.24; H, 9.01; N, 5.77; Found, C, 74.21; H, 9.03; N, 5.73.

*2.19 Synthesis of N-(3,5-bis(heptyloxy)benzylidene)-4-((3',5'-bis(heptyloxy)benzylidene)amino)benzohydrazide (3, n=7)*

Yield: 77 %. IR (KBr, cm<sup>-1</sup>): 3222 v<sub>s</sub> (N-H), 2926, 2856 (aliphatic C-H), 1644 (amide-I, C=O), 1572 (amide-II, N-H), 1623 (-C=N), 1603, 1518 (Ph), 1309, 1280 (OPh), 1026 (N-N); <sup>1</sup>H NMR (300 MHz, CDCl<sub>3</sub>, 40°C): δ 9.33 (s, 1H, -NH), 8.29 (s, 1H, -CH=N), 7.94 (s, 1H, -CH=N), 7.22 (d, J(H,H)=8.4 Hz, 2H, -C<sub>6</sub>H<sub>4</sub>), 6.98 (d, J(H,H)=8.4 Hz, 2H, -C<sub>6</sub>H<sub>4</sub>), 6.83 (s, 4H, -C<sub>6</sub>H<sub>3</sub>), 6.48 (s, 2H, -C<sub>6</sub>H<sub>3</sub>), 4.01 (m, 8H, -OCH<sub>2</sub>), 1.83 (m, 8H, -OCH<sub>2</sub>CH<sub>2</sub>), 1.45-1.27 (m, 32H, -[CH<sub>2</sub>]<sub>16</sub>), 0.90 (t, J(H,H)=6.3 Hz, 12H, -CH<sub>3</sub>); <sup>13</sup>C NMR (75 MHz, CDCl<sub>3</sub>, 40°C): δ<sub>c</sub> 160.96, 159.12, 156.28, 147.13, 140.81, 130.33, 129.28, 128.33, 123.49, 114.57, 114.08, 107.70, 68.70, 68.04, 31.93, 30.34, 29.68, 29.39, 26.06, 22.69, 14.10; Elemental analyses: calculated for C<sub>49</sub>H<sub>73</sub>N<sub>3</sub>O<sub>5</sub> (%), C, 75.06; H, 9.38; N, 5.36; Found, C, 75.01; H, 9.33; N, 5.39.

*2.20 Synthesis of N-(3,5-bis(octyloxy)benzylidene)-4-((3',5'-bis(octyloxy)benzylidene)amino)benzohydrazide (3, n=8)*

Yield: 81 %. IR (KBr, cm<sup>-1</sup>): 3220 v<sub>s</sub> (N-H), 2928, 2858 (aliphatic C-H), 1647 (amide-I, C=O), 1572 (amide-II, N-H), 1623 (-C=N), 1601, 1520 (Ph), 1309, 1278 (OPh), 1024 (N-N); <sup>1</sup>H NMR (300 MHz, CDCl<sub>3</sub>, 40°C): δ 9.34 (s, 1H, -NH), 8.28 (s, 1H, -CH=N), 7.94 (s, 1H, -CH=N), 7.21 (d, J(H,H)=8.4 Hz, 2H, -C<sub>6</sub>H<sub>4</sub>), 6.98 (d, J(H,H)=8.4 Hz, 2H, -C<sub>6</sub>H<sub>4</sub>), 6.82 (s, 4H, -C<sub>6</sub>H<sub>3</sub>), 6.47 (s, 2H, -C<sub>6</sub>H<sub>3</sub>), 4.02 (m, 8H, -OCH<sub>2</sub>), 1.84 (m, 8H, -OCH<sub>2</sub>CH<sub>2</sub>), 1.45-1.27 (m, 40H, -[CH<sub>2</sub>]<sub>20</sub>), 0.89 (t, J(H,H)=6.3 Hz, 12H, -CH<sub>3</sub>); <sup>13</sup>C NMR (75 MHz, CDCl<sub>3</sub>, 40°C): δ<sub>c</sub> 160.95, 159.14, 156.28, 147.12, 140.84, 130.35, 129.28, 128.35, 123.49, 114.57, 114.05, 107.73, 68.70, 68.06, 31.94, 30.34, 29.69, 29.39, 26.06, 22.68, 14.13; Elemental analyses: calculated for C<sub>53</sub>H<sub>81</sub>N<sub>3</sub>O<sub>5</sub> (%), C, 75.76; H, 9.72; N, 5.00; Found, C, 75.80; H, 9.74; N, 4.96.

*2.21 Synthesis of N-(3,5-bis(decyloxy)benzylidene)-4-((3',5'-bis(decyloxy)benzylidene)amino)benzohydrazide (3, n=10)*

Yield: 76 %. IR (KBr, cm<sup>-1</sup>): 3220 v<sub>s</sub> (N-H), 2926, 2856 (aliphatic C-H), 1646 (amide-I, C=O), 1574 (amide-II, N-H), 1623 (-C=N), 1604, 1518 (Ph), 1307, 1278 (OPh), 1026 (N-N); <sup>1</sup>H NMR (300 MHz, CDCl<sub>3</sub>, 40°C): δ 9.34 (s, 1H, -NH), 8.29 (s, 1H, -CH=N), 7.94 (s, 1H, -CH=N), 7.21 (d, J(H,H)=8.4 Hz, 2H, -C<sub>6</sub>H<sub>4</sub>), 6.98 (d, J(H,H)=8.4 Hz, 2H, -C<sub>6</sub>H<sub>4</sub>), 6.83 (s, 4H, -C<sub>6</sub>H<sub>3</sub>), 6.48 (s, 2H, -C<sub>6</sub>H<sub>3</sub>), 4.02 (m, 8H, -OCH<sub>2</sub>), 1.83 (m, 8H, -OCH<sub>2</sub>CH<sub>2</sub>), 1.45-1.27 (m, 56H, -[CH<sub>2</sub>]<sub>28</sub>), 0.90 (t, J(H,H)=6.3 Hz, 12H, -CH<sub>3</sub>); <sup>13</sup>C NMR (75 MHz, CDCl<sub>3</sub>, 40°C): δ<sub>c</sub> 160.95, 159.12, 156.28, 147.13, 140.84, 130.33, 129.28, 128.35, 123.49, 114.57, 114.05, 107.70, 68.70, 68.06, 31.93, 30.34, 29.68, 29.39, 26.06, 22.68, 14.10; Elemental analyses: calculated for C<sub>61</sub>H<sub>97</sub>N<sub>3</sub>O<sub>5</sub> (%), C, 76.92; H, 10.27; N, 4.41; Found, C, 76.86; H, 10.23; N, 4.44.

*2.22 Synthesis of N-(3,5-bis(dodecyloxy)benzylidene)-4-((3',5'-bis(dodecyloxy)benzylidene)amino)benzohydrazide (3, n=12)*

Yield: 79 %. IR (KBr, cm<sup>-1</sup>): 3218 v<sub>s</sub> (N-H), 2926, 2856 (aliphatic C-H), 1647 (amide-I, C=O), 1572 (amide-II, N-H), 1621 (-C=N), 1601, 1519 (Ph), 1309, 1281 (OPh), 1026 (N-N); <sup>1</sup>H NMR (300 MHz, CDCl<sub>3</sub>, 40°C): δ 9.35 (s, 1H, -NH), 8.29 (s, 1H, -CH=N), 7.93 (s, 1H, -CH=N), 7.21 (d, J(H,H)=8.4 Hz, 2H, -C<sub>6</sub>H<sub>4</sub>), 6.99 (d, J(H,H)=8.4 Hz, 2H, -C<sub>6</sub>H<sub>4</sub>), 6.83 (s, 4H, -C<sub>6</sub>H<sub>3</sub>), 6.48 (s, 2H, -C<sub>6</sub>H<sub>3</sub>), 4.03 (m, 8H, -OCH<sub>2</sub>), 1.83 (m, 8H, -



OCH<sub>2</sub>CH<sub>2</sub>), 1.45-1.27 (m, 72H, -[CH<sub>2</sub>]<sub>36</sub>), 0.90 (t, J(H,H)=6.3 Hz, 12H, -CH<sub>3</sub>); <sup>13</sup>C NMR (75 MHz, CDCl<sub>3</sub>, 40°C): δ<sub>c</sub> 160.95, 159.12, 156.26, 147.13, 140.82, 130.33, 129.27, 128.35, 123.48, 114.57, 114.05, 107.70, 68.70, 68.07, 31.93, 30.34, 29.68, 29.37, 26.06, 22.68, 14.10; Elemental analyses: calculated for C<sub>69</sub>H<sub>113</sub>N<sub>3</sub>O<sub>5</sub> (%), C, 77.84; H, 10.70; N, 3.95; Found, C, 77.76; H, 10.65; N, 3.90.

*2.23 Synthesis of N-(3,5-bis(tetradecyloxy)benzylidene)-4-((3',5'-bis(tetradecyloxy)benzylidene)amino)benzohydrazide (3, n=14)*

Yield: 82 %. IR (KBr, cm<sup>-1</sup>): 3220 v<sub>s</sub> (N-H), 2926, 2857 (aliphatic C-H), 1647 (amide-I, C=O), 1575 (amide-II, N-H), 1623 (-C=N), 1601, 1516 (Ph), 1309, 1278 (OPh), 1025 (N-N); <sup>1</sup>H NMR (300 MHz, CDCl<sub>3</sub>, 40°C): δ 9.32 (s, 1H, -NH), 8.29 (s, 1H, -CH=N), 7.92 (s, 1H, -CH=N), 7.21 (d, J(H,H)=8.4 Hz, 2H, -C<sub>6</sub>H<sub>4</sub>), 6.98 (d, J(H,H)=8.4 Hz, 2H, -C<sub>6</sub>H<sub>4</sub>), 6.85 (s, 4H, -C<sub>6</sub>H<sub>3</sub>), 6.48 (s, 2H, -C<sub>6</sub>H<sub>3</sub>), 4.01 (m, 8H, -OCH<sub>2</sub>), 1.85 (m, 8H, -OCH<sub>2</sub>CH<sub>2</sub>), 1.45-1.27 (m, 88H, -[CH<sub>2</sub>]<sub>44</sub>), 0.92 (t, J(H,H)=6.3 Hz, 12H, -CH<sub>3</sub>); <sup>13</sup>C NMR (75 MHz, CDCl<sub>3</sub>, 40°C): δ<sub>c</sub> 160.94, 159.12, 156.29, 147.13, 140.84, 130.33, 129.28, 128.34, 123.49, 114.58, 114.05, 107.70, 68.72, 68.06, 31.93, 30.34, 29.68, 29.39, 26.07, 22.68, 14.10; Elemental analyses: calculated for C<sub>77</sub>H<sub>129</sub>N<sub>3</sub>O<sub>5</sub> (%), C, 78.58; H, 11.05; N, 3.57; Found, C, 78.51; H, 10.98; N, 3.53.

*2.24 Synthesis of N-(3,5-bis(hexadecyloxy)benzylidene)-4-((3',5'-bis(hexadecyloxy)benzylidene)amino)benzohydrazide (3, n=16)*

Yield: 80 %. IR (KBr, cm<sup>-1</sup>): 3219 v<sub>s</sub> (N-H), 2926, 2856 (aliphatic C-H), 1647 (amide-I, C=O), 1572 (amide-II, N-H), 1625 (-C=N), 1603, 1518 (Ph), 1308, 1278 (OPh), 1026 (N-N); <sup>1</sup>H NMR (300 MHz, CDCl<sub>3</sub>, 40°C): δ 9.34 (s, 1H, -NH), 8.30 (s, 1H, -CH=N), 7.94 (s, 1H, -CH=N), 7.21 (d, J(H,H)=8.4 Hz, 2H, -C<sub>6</sub>H<sub>4</sub>), 6.98 (d, J(H,H)=8.4 Hz, 2H, -C<sub>6</sub>H<sub>4</sub>), 6.81 (s, 4H, -C<sub>6</sub>H<sub>3</sub>), 6.50 (s, 2H, -C<sub>6</sub>H<sub>3</sub>), 4.02 (m, 8H, -OCH<sub>2</sub>), 1.83 (m, 8H, -OCH<sub>2</sub>CH<sub>2</sub>), 1.45-1.27 (m, 104H, -[CH<sub>2</sub>]<sub>52</sub>), 0.90 (t, J(H,H)=6.3 Hz, 12H, -CH<sub>3</sub>); <sup>13</sup>C NMR (75 MHz, CDCl<sub>3</sub>, 40°C): δ<sub>c</sub> 160.95, 159.13, 156.28, 147.14, 140.84, 130.32, 129.28, 128.35, 123.49, 114.57, 114.06, 107.71, 68.70, 68.06, 31.93, 30.34, 29.68, 29.39, 26.06, 22.68, 14.11; Elemental analyses: calculated for C<sub>85</sub>H<sub>145</sub>N<sub>3</sub>O<sub>5</sub> (%), C, 79.20; H, 11.34; N, 3.26; Found, C, 79.12; H, 11.31; N, 3.22.

*2.25 Synthesis of N-(2,3,4-tris(pentyloxy)benzylidene)-4-((2',3',4'-tris(pentyloxy)benzylidene)amino)benzohydrazide (4, n=5)*

Yield: 78 %. IR (KBr, cm<sup>-1</sup>): 3317 v<sub>s</sub> (N-H), 2922, 2854 (aliphatic C-H), 1652 (amide-I, C=O), 1570 (amide-II, N-H), 1625 (-C=N), 1604, 1515 (Ph), 1303, 1285 (OPh), 1022 (N-N); <sup>1</sup>H NMR (300 MHz, CDCl<sub>3</sub>/DMSO-d<sub>6</sub>, 30°C): δ 10.70 (s, 1H, -NH), 8.78 (s, 1H, -CH=N), 8.57 (s, 1H, -CH=N), 7.96 (d, J(H,H)=7.2 Hz, 2H, -C<sub>6</sub>H<sub>4</sub>), 7.81 (d, J(H,H)=8.4 Hz, 2H, -C<sub>6</sub>H<sub>4</sub>), 7.27 (d, J(H,H)=8.1 Hz, 2H, -C<sub>6</sub>H<sub>2</sub>), 6.78 (dd, J<sub>1</sub>(H,H)=9.0 Hz, J<sub>2</sub>(H,H)=9.0 Hz, 2H, -C<sub>6</sub>H<sub>2</sub>), 4.15 (m, 12H, -OCH<sub>2</sub>), 1.85 (m, 12H, -OCH<sub>2</sub>CH<sub>2</sub>), 1.48-1.26 (m, 24H, -[CH<sub>2</sub>]<sub>12</sub>), 0.88 (t, J(H,H)=6.3 Hz, 18H, -CH<sub>3</sub>); <sup>13</sup>C NMR (75 MHz, CDCl<sub>3</sub>/DMSO-d<sub>6</sub>, 30°C): δ<sub>c</sub> 163.92, 155.09, 152.80, 152.42, 151.08, 140.90, 136.21, 129.30, 122.69, 120.24, 114.25, 111.66, 108.45, 74.54, 73.39, 68.49, 31.67, 30.10, 29.36, 29.10, 25.88, 25.78, 22.45, 13.87; Elemental analyses: calculated for C<sub>51</sub>H<sub>77</sub>N<sub>3</sub>O<sub>7</sub> (%), C, 72.56; H, 9.19; N, 4.98; Found, C, 72.50; H, 9.10; N, 4.92.

*2.26 Synthesis of N-(2,3,4-tris(hexyloxy)benzylidene)-4-((2',3',4'-tris(hexyloxy)benzylidene)amino)benzohydrazide (4, n=6)*

Yield: 76 %. IR (KBr,  $\text{cm}^{-1}$ ): 3316  $\nu_s$  (N-H), 2921, 2856 (aliphatic C-H), 1651 (amide-I, C=O), 1571 (amide-II, N-H), 1624 (-C=N), 1606, 1515 (Ph), 1305, 1285 (OPh), 1021 (N-N);  $^1\text{H}$  NMR (300 MHz,  $\text{CDCl}_3/\text{DMSO-d}_6$ ,  $30^\circ\text{C}$ ):  $\delta$  10.69 (s, 1H, -NH), 8.78 (s, 1H, -CH=N), 8.59 (s, 1H, -CH=N), 7.96 (d,  $J(\text{H,H})=7.2$  Hz, 2H, -C<sub>6</sub>H<sub>4</sub>), 7.82 (d,  $J(\text{H,H})=8.4$  Hz, 2H, -C<sub>6</sub>H<sub>4</sub>), 7.27 (d,  $J(\text{H,H})=8.1$  Hz, 2H, -C<sub>6</sub>H<sub>2</sub>), 6.79 (dd,  $J_1(\text{H,H})=9.0$  Hz,  $J_2(\text{H,H})=9.0$  Hz, 2H, -C<sub>6</sub>H<sub>2</sub>), 4.15 (m, 12H, -OCH<sub>2</sub>), 1.86 (m, 12H, -OCH<sub>2</sub>CH<sub>2</sub>), 1.48-1.26 (m, 36H, -[CH<sub>2</sub>]<sub>18</sub>), 0.88 (t,  $J(\text{H,H})=6.3$  Hz, 18H, -CH<sub>3</sub>);  $^{13}\text{C}$  NMR (75 MHz,  $\text{CDCl}_3/\text{DMSO-d}_6$ ,  $30^\circ\text{C}$ ):  $\delta_c$  163.93, 155.07, 152.81, 152.41, 151.10, 140.89, 136.23, 129.32, 122.68, 120.25, 114.26, 111.66, 108.45, 74.56, 73.39, 68.49, 31.69, 30.09, 29.36, 29.10, 25.88, 25.79, 22.45, 13.88; Elemental analyses: calculated for C<sub>57</sub>H<sub>89</sub>N<sub>3</sub>O<sub>7</sub> (%), C, 73.75; H, 9.66; N, 4.53; Found, C, 73.69; H, 9.68; N, 4.49.

*2.27 Synthesis of N-(2,3,4-tris(heptyloxy)benzylidene)-4-[(2',3',4'-tris(heptyloxy)benzylidene)amino]benzohydrazide (4, n=7)*

Yield: 77 %. IR (KBr,  $\text{cm}^{-1}$ ): 3316  $\nu_s$  (N-H), 2924, 2854 (aliphatic C-H), 1653 (amide-I, C=O), 1572 (amide-II, N-H), 1624 (-C=N), 1604, 1515 (Ph), 1303, 1286 (OPh), 1021 (N-N);  $^1\text{H}$  NMR (300 MHz,  $\text{CDCl}_3/\text{DMSO-d}_6$ ,  $30^\circ\text{C}$ ):  $\delta$  10.67 (s, 1H, -NH), 8.76 (s, 1H, -CH=N), 8.59 (s, 1H, -CH=N), 7.96 (d,  $J(\text{H,H})=7.2$  Hz, 2H, -C<sub>6</sub>H<sub>4</sub>), 7.83 (d,  $J(\text{H,H})=8.4$  Hz, 2H, -C<sub>6</sub>H<sub>4</sub>), 7.27 (d,  $J(\text{H,H})=8.1$  Hz, 2H, -C<sub>6</sub>H<sub>2</sub>), 6.77 (dd,  $J_1(\text{H,H})=9.0$  Hz,  $J_2(\text{H,H})=9.0$  Hz, 2H, -C<sub>6</sub>H<sub>2</sub>), 4.13 (m, 12H, -OCH<sub>2</sub>), 1.85 (m, 12H, -OCH<sub>2</sub>CH<sub>2</sub>), 1.48-1.25 (m, 48H, -[CH<sub>2</sub>]<sub>24</sub>), 0.88 (t,  $J(\text{H,H})=6.3$  Hz, 18H, -CH<sub>3</sub>);  $^{13}\text{C}$  NMR (75 MHz,  $\text{CDCl}_3/\text{DMSO-d}_6$ ,  $30^\circ\text{C}$ ):  $\delta_c$  163.92, 155.07, 152.80, 152.42, 151.08, 140.88, 136.21, 129.31, 122.69, 120.23, 114.26, 111.67, 108.45, 74.54, 73.38, 68.49, 31.67, 30.09, 29.37, 29.10, 25.89, 25.79, 22.45, 13.87; Elemental analyses: calculated for C<sub>63</sub>H<sub>101</sub>N<sub>3</sub>O<sub>7</sub> (%), C, 74.73; H, 10.05; N, 4.15; Found, C, 74.61; H, 9.96; N, 4.07.

*2.28 Synthesis of N-(2,3,4-tris(octyloxy)benzylidene)-4-[(2',3',4'-tris(octyloxy)benzylidene)amino]benzohydrazide (4, n=8)*

Yield: 81 %. IR (KBr,  $\text{cm}^{-1}$ ): 3318  $\nu_s$  (N-H), 2920, 2852 (aliphatic C-H), 1650 (amide-I, C=O), 1574 (amide-II, N-H), 1623 (-C=N), 1606, 1518 (Ph), 1308, 1282 (OPh), 1020 (N-N);  $^1\text{H}$  NMR (300 MHz,  $\text{CDCl}_3/\text{DMSO-d}_6$ ,  $30^\circ\text{C}$ ):  $\delta$  10.65 (s, 1H, -NH), 8.75 (s, 1H, -CH=N), 8.55 (s, 1H, -CH=N), 7.95 (d,  $J(\text{H,H})=7.2$  Hz, 2H, -C<sub>6</sub>H<sub>4</sub>), 7.85 (d,  $J(\text{H,H})=8.4$  Hz, 2H, -C<sub>6</sub>H<sub>4</sub>), 7.25 (d,  $J(\text{H,H})=8.1$  Hz, 2H, -C<sub>6</sub>H<sub>2</sub>), 6.75 (dd,  $J_1(\text{H,H})=9.0$  Hz,  $J_2(\text{H,H})=9.0$  Hz, 2H, -C<sub>6</sub>H<sub>2</sub>), 4.14 (m, 12H, -OCH<sub>2</sub>), 1.88 (m, 12H, -OCH<sub>2</sub>CH<sub>2</sub>), 1.48-1.25 (m, 60H, -[CH<sub>2</sub>]<sub>30</sub>), 0.89 (t,  $J(\text{H,H})=6.3$  Hz, 18H, -CH<sub>3</sub>);  $^{13}\text{C}$  NMR (75 MHz,  $\text{CDCl}_3/\text{DMSO-d}_6$ ,  $30^\circ\text{C}$ ):  $\delta_c$  163.91, 155.08, 152.83, 152.41, 151.09, 140.89, 136.22, 129.32, 122.70, 120.24, 114.24, 111.66, 108.45, 74.54, 73.39, 68.48, 31.67, 30.09, 29.36, 29.12, 25.88, 25.80, 22.45, 13.86; Elemental analyses: calculated for C<sub>69</sub>H<sub>113</sub>N<sub>3</sub>O<sub>7</sub> (%), C, 75.57; H, 10.39; N, 3.83; Found, C, 75.49; H, 10.32; N, 3.79.

*2.29 Synthesis of N-(2,3,4-tris(decyloxy)benzylidene)-4-[(2',3',4'-tris(decyloxy)benzylidene)amino]benzohydrazide (4, n=10)*

Yield: 80 %. IR (KBr,  $\text{cm}^{-1}$ ): 3316  $\nu_s$  (N-H), 2922, 2854 (aliphatic C-H), 1651 (amide-I, C=O), 1570 (amide-II, N-H), 1624 (-C=N), 1604, 1515 (Ph), 1303, 1285 (OPh), 1021 (N-N);  $^1\text{H}$  NMR (300 MHz,  $\text{CDCl}_3/\text{DMSO-d}_6$ ,  $30^\circ\text{C}$ ):  $\delta$  10.61 (s, 1H, -NH), 8.74 (s, 1H, -CH=N), 8.58 (s, 1H, -CH=N), 7.98 (d,  $J(\text{H,H})=7.2$  Hz, 2H, -C<sub>6</sub>H<sub>4</sub>), 7.86 (d,  $J(\text{H,H})=8.4$  Hz, 2H, -C<sub>6</sub>H<sub>4</sub>), 7.24 (d,  $J(\text{H,H})=8.1$  Hz, 2H, -C<sub>6</sub>H<sub>2</sub>), 6.78 (dd,  $J_1(\text{H,H})=9.0$  Hz,  $J_2(\text{H,H})=9.0$  Hz, 2H, -C<sub>6</sub>H<sub>2</sub>), 4.13 (m, 12H, -OCH<sub>2</sub>), 1.87 (m, 12H, -OCH<sub>2</sub>CH<sub>2</sub>), 1.48-1.27 (m, 84H, -[CH<sub>2</sub>]<sub>42</sub>), 0.90 (t,  $J(\text{H,H})=5.1$  Hz, 18H, -CH<sub>3</sub>);  $^{13}\text{C}$  NMR (75 MHz,  $\text{CDCl}_3/\text{DMSO-d}_6$ ,  $30^\circ\text{C}$ ):  $\delta_c$  163.92, 155.07, 152.80, 152.41,

151.08, 140.89, 136.21, 129.32, 122.69, 120.24, 114.26, 111.66, 108.45, 74.54, 73.39, 68.49, 31.67, 30.09, 29.36, 29.10, 25.88, 25.79, 22.45, 13.87; Elemental analyses: calculated for C<sub>81</sub>H<sub>137</sub>N<sub>3</sub>O<sub>7</sub> (%), C, 76.91; H, 10.92; N, 3.32; Found, C, 76.84; H, 10.88; N, 3.29.

*2.30 Synthesis of N-(2,3,4-tris(dodecyloxy)benzylidene)-4-{(2',3',4'-tris(dodecyloxy)benzylidene)amino}benzohydrazide (4, n=12)*

Yield: 82 %. IR (KBr, cm<sup>-1</sup>): 3316 v<sub>s</sub> (N-H), 2923, 2854 (aliphatic C-H), 1651 (amide-I, C=O), 1573 (amide-II, N-H), 1624 (-C=N), 1604, 1516 (Ph), 1303, 1285 (OPh), 1021 (N-N); <sup>1</sup>H NMR (300 MHz, CDCl<sub>3</sub>/DMSO-d<sup>6</sup>, 30°C): δ 10.63 (s, 1H, -NH), 8.77 (s, 1H, -CH=N), 8.56 (s, 1H, -CH=N), 7.97 (d, J(H,H)=7.2 Hz, 2H, -C<sub>6</sub>H<sub>4</sub>), 7.83 (d, J(H,H)=8.4 Hz, 2H, -C<sub>6</sub>H<sub>4</sub>), 7.24 (d, J(H,H)=8.1 Hz, 2H, -C<sub>6</sub>H<sub>2</sub>), 6.76 (dd, J<sub>1</sub>(H,H)=9.0 Hz, J<sub>2</sub>(H,H)=9.0 Hz, 2H, -C<sub>6</sub>H<sub>2</sub>), 4.18 (m, 12H, -OCH<sub>2</sub>), 1.89 (m, 12H, -OCH<sub>2</sub>CH<sub>2</sub>), 1.49-1.27 (m, 108H, -[CH<sub>2</sub>]<sub>54</sub>), 0.86 (t, J(H,H)=6.3 Hz, 18H, -CH<sub>3</sub>); <sup>13</sup>C NMR (75 MHz, CDCl<sub>3</sub>/DMSO-d<sup>6</sup>, 30°C): δ<sub>c</sub> 163.92, 155.07, 152.79, 152.40, 151.06, 140.90, 136.21, 129.30, 122.70, 120.24, 114.26, 111.66, 108.49, 74.55, 73.39, 68.49, 31.67, 30.10, 29.36, 29.10, 25.90, 25.79, 22.46, 13.85; Elemental analyses: calculated for C<sub>93</sub>H<sub>161</sub>N<sub>3</sub>O<sub>7</sub> (%), C, 77.93; H, 11.32; N, 2.93; Found, C, 77.82; H, 11.26; N, 2.88.

*2.31 Synthesis of N-(2,3,4-tris(tetradecyloxy)benzylidene)-4-{(2',3',4'-tris(tetradecyloxy)benzylidene)amino}benzohydrazide (4, n=14)*

Yield: 76 %. IR (KBr, cm<sup>-1</sup>): 3317 v<sub>s</sub> (N-H), 2921, 2853 (aliphatic C-H), 1652 (amide-I, C=O), 1570 (amide-II, N-H), 1626 (-C=N), 1604, 1520 (Ph), 1303, 1285 (OPh), 1023 (N-N); <sup>1</sup>H NMR (300 MHz, CDCl<sub>3</sub>/DMSO-d<sup>6</sup>, 30°C): δ 10.60 (s, 1H, -NH), 8.72 (s, 1H, -CH=N), 8.53 (s, 1H, -CH=N), 7.99 (d, J(H,H)=7.2 Hz, 2H, -C<sub>6</sub>H<sub>4</sub>), 7.84 (d, J(H,H)=8.4 Hz, 2H, -C<sub>6</sub>H<sub>4</sub>), 7.26 (d, J(H,H)=8.1 Hz, 2H, -C<sub>6</sub>H<sub>2</sub>), 6.74 (dd, J<sub>1</sub>(H,H)=9.0 Hz, J<sub>2</sub>(H,H)=9.0 Hz, 2H, -C<sub>6</sub>H<sub>2</sub>), 4.17 (m, 12H, -OCH<sub>2</sub>), 1.85 (m, 12H, -OCH<sub>2</sub>CH<sub>2</sub>), 1.47-1.24 (m, 132H, -[CH<sub>2</sub>]<sub>66</sub>), 0.91 (t, J(H,H)=6.3 Hz, 18H, -CH<sub>3</sub>); <sup>13</sup>C NMR (75 MHz, CDCl<sub>3</sub>/DMSO-d<sup>6</sup>, 30°C): δ<sub>c</sub> 163.94, 155.10, 152.80, 152.41, 151.08, 140.89, 136.20, 129.29, 122.69, 120.22, 114.25, 111.66, 108.47, 74.54, 73.37, 68.49, 31.67, 30.09, 29.36, 29.12, 25.77, 25.79, 22.43, 13.85; Elemental analyses: calculated for C<sub>105</sub>H<sub>185</sub>N<sub>3</sub>O<sub>7</sub> (%), C, 78.74; H, 11.64; N, 2.62; Found, C, 78.67; H, 11.57; N, 2.56.

*2.32 Synthesis of N-(2,3,4-tris(hexadecyloxy)benzylidene)-4-{(2',3',4'-tris(hexadecyloxy)benzylidene)amino}benzohydrazide (4, n=16)*

Yield: 78 %. IR (KBr, cm<sup>-1</sup>): 3319 v<sub>s</sub> (N-H), 2925, 2856 (aliphatic C-H), 1653 (amide-I, C=O), 1572 (amide-II, N-H), 1621 (-C=N), 1608, 1517 (Ph), 1305, 1288 (OPh), 1019 (N-N); <sup>1</sup>H NMR (300 MHz, CDCl<sub>3</sub>/DMSO-d<sup>6</sup>, 30°C): δ 10.64 (s, 1H, -NH), 8.74 (s, 1H, -CH=N), 8.52 (s, 1H, -CH=N), 7.95 (d, J(H,H)=7.2 Hz, 2H, -C<sub>6</sub>H<sub>4</sub>), 7.82 (d, J(H,H)=8.4 Hz, 2H, -C<sub>6</sub>H<sub>4</sub>), 7.25 (d, J(H,H)=8.1 Hz, 2H, -C<sub>6</sub>H<sub>2</sub>), 6.73 (dd, J<sub>1</sub>(H,H)=9.0 Hz, J<sub>2</sub>(H,H)=9.0 Hz, 2H, -C<sub>6</sub>H<sub>2</sub>), 4.15 (m, 12H, -OCH<sub>2</sub>), 1.87 (m, 12H, -OCH<sub>2</sub>CH<sub>2</sub>), 1.46-1.27 (m, 156H, -[CH<sub>2</sub>]<sub>78</sub>), 0.89 (t, J(H,H)=6.3 Hz, 18H, -CH<sub>3</sub>); <sup>13</sup>C NMR (75 MHz, CDCl<sub>3</sub>/DMSO-d<sup>6</sup>, 30°C): δ<sub>c</sub> 163.92, 155.08, 152.80, 152.42, 151.08, 140.90, 136.21, 129.30, 122.69, 120.24, 114.26, 111.66, 108.45, 74.54, 73.39, 68.46, 31.67, 30.09, 29.36, 29.10, 25.88, 25.79, 22.47, 13.86; Elemental analyses: calculated for C<sub>117</sub>H<sub>209</sub>N<sub>3</sub>O<sub>7</sub> (%), C, 79.40; H, 11.90; N, 2.37; Found, C, 79.32; H, 11.80; N, 2.29.

*2.33 Synthesis of N-(3,4,5-tris(pentyloxy)benzylidene)-4-{(3',4',5'-tris(pentyloxy)benzylidene)amino}benzohydrazide (5, n=5)*

Yield: 73 %. IR (KBr,  $\text{cm}^{-1}$ ): 3343  $\nu_s$  (N-H), 2922, 2856 (aliphatic C-H), 1640 (amide-I, C=O), 1570 (amide-II, N-H), 1628 (-C=N), 1600, 1507 (Ph), 1306, 1285 (OPh), 1016 (N-N);  $^1\text{H}$  NMR (300 MHz,  $\text{CDCl}_3/\text{DMSO-d}_6$ ,  $30^\circ\text{C}$ ):  $\delta$  9.97 (s, 1H, -NH), 8.12 (s, 2H, -CH=N), 7.73 (d,  $J(\text{H,H})=5.7$  Hz, 2H, - $\text{C}_6\text{H}_4$ ), 6.92 (s, 4H, - $\text{C}_6\text{H}_2$ ), 6.68 (d,  $J(\text{H,H})=7.5$  Hz, 2H, - $\text{C}_6\text{H}_4$ ), 4.01 (m, 12H, - $\text{OCH}_2$ ), 1.81 (m, 12H, - $\text{OCH}_2\text{CH}_2$ ), 1.48-1.23 (m, 24H, - $[\text{CH}_2]_{12}$ ), 0.89 (t,  $J(\text{H,H})=6.9$  Hz, 18H, - $\text{CH}_3$ );  $^{13}\text{C}$  NMR (75 MHz,  $\text{CDCl}_3$ ,  $40^\circ\text{C}$ ):  $\delta_c$  166.55, 163.74, 163.27, 162.68, 155.40, 152.29, 133.55, 132.39, 131.06, 128.39, 114.37, 113.42, 110.74, 73.08, 68.38, 31.88, 29.53, 29.34, 29.07, 25.97, 22.67, 14.09; Elemental analyses: calculated for  $\text{C}_{51}\text{H}_{77}\text{N}_3\text{O}_7$  (%), C, 72.56; H, 9.19; N, 4.98; Found, C, 72.48; H, 9.13; N, 4.93.

*2.34 Synthesis of N-(3,4,5-tris(hexyloxy)benzylidene)-4-((3',4',5'-tris(hexyloxy)benzylidene)amino)benzohydrazide (5, n=6)*

Yield: 75 %. IR (KBr,  $\text{cm}^{-1}$ ): 3340  $\nu_s$  (N-H), 2924, 2853 (aliphatic C-H), 1643 (amide-I, C=O), 1576 (amide-II, N-H), 1620 (-C=N), 1599, 1502 (Ph), 1300, 1282 (OPh), 1011 (N-N);  $^1\text{H}$  NMR (300 MHz,  $\text{CDCl}_3/\text{DMSO-d}_6$ ,  $30^\circ\text{C}$ ):  $\delta$  9.98 (s, 1H, -NH), 8.13 (s, 2H, -CH=N), 7.75 (d,  $J(\text{H,H})=5.7$  Hz, 2H, - $\text{C}_6\text{H}_4$ ), 6.97 (s, 4H, - $\text{C}_6\text{H}_2$ ), 6.71 (d,  $J(\text{H,H})=7.5$  Hz, 2H, - $\text{C}_6\text{H}_4$ ), 4.05 (m, 12H, - $\text{OCH}_2$ ), 1.80 (m, 12H, - $\text{OCH}_2\text{CH}_2$ ), 1.47-1.28 (m, 36H, - $[\text{CH}_2]_{18}$ ), 0.88 (t,  $J(\text{H,H})=6.9$  Hz, 18H, - $\text{CH}_3$ );  $^{13}\text{C}$  NMR (75 MHz,  $\text{CDCl}_3$ ,  $40^\circ\text{C}$ ):  $\delta_c$  166.55, 163.74, 163.28, 162.69, 155.42, 152.30, 133.55, 132.38, 131.06, 128.36, 114.37, 113.43, 110.75, 73.08, 68.37, 31.86, 29.54, 29.33, 29.07, 25.97, 22.67, 14.12; Elemental analyses: calculated for  $\text{C}_{57}\text{H}_{89}\text{N}_3\text{O}_7$  (%), C, 73.75; H, 9.66; N, 4.53; Found, C, 73.63; H, 9.62; N, 4.49.

*2.35 Synthesis of N-(3,4,5-tris(heptyloxy)benzylidene)-4-((3',4',5'-tris(heptyloxy)benzylidene)amino)benzohydrazide (5, n=7)*

Yield: 76 %. IR (KBr,  $\text{cm}^{-1}$ ): 3347  $\nu_s$  (N-H), 2925, 2851 (aliphatic C-H), 1641 (amide-I, C=O), 1571 (amide-II, N-H), 1627 (-C=N), 1602, 1506 (Ph), 1303, 1284 (OPh), 1016 (N-N);  $^1\text{H}$  NMR (300 MHz,  $\text{CDCl}_3/\text{DMSO-d}_6$ ,  $30^\circ\text{C}$ ):  $\delta$  10.03 (s, 1H, -NH), 8.10 (s, 2H, -CH=N), 7.76 (d,  $J(\text{H,H})=5.7$  Hz, 2H, - $\text{C}_6\text{H}_4$ ), 6.98 (s, 4H, - $\text{C}_6\text{H}_2$ ), 6.69 (d,  $J(\text{H,H})=7.5$  Hz, 2H, - $\text{C}_6\text{H}_4$ ), 4.02 (m, 12H, - $\text{OCH}_2$ ), 1.80 (m, 12H, - $\text{OCH}_2\text{CH}_2$ ), 1.47-1.26 (m, 48H, - $[\text{CH}_2]_{24}$ ), 0.88 (t,  $J(\text{H,H})=6.9$  Hz, 18H, - $\text{CH}_3$ );  $^{13}\text{C}$  NMR (75 MHz,  $\text{CDCl}_3$ ,  $40^\circ\text{C}$ ):  $\delta_c$  166.55, 163.74, 163.27, 162.68, 155.42, 152.28, 133.55, 132.38, 131.07, 128.37, 114.37, 113.43, 110.75, 73.08, 68.38, 31.88, 29.54, 29.35, 29.07, 25.97, 22.68, 14.10; Elemental analyses: calculated for  $\text{C}_{63}\text{H}_{101}\text{N}_3\text{O}_7$  (%), C, 74.73; H, 10.05; N, 4.15; Found, C, 74.63; H, 9.97; N, 4.09.

*2.36 Synthesis of N-(3,4,5-tris(octyloxy)benzylidene)-4-((3',4',5'-tris(octyloxy)benzylidene)amino)benzohydrazide (5, n=8)*

Yield: 77 %. IR (KBr,  $\text{cm}^{-1}$ ): 3346  $\nu_s$  (N-H), 2927, 2850 (aliphatic C-H), 1645 (amide-I, C=O), 1574 (amide-II, N-H), 1626 (-C=N), 1597, 1501 (Ph), 1304, 1284 (OPh), 1010 (N-N);  $^1\text{H}$  NMR (300 MHz,  $\text{CDCl}_3/\text{DMSO-d}_6$ ,  $30^\circ\text{C}$ ):  $\delta$  10.02 (s, 1H, -NH), 8.17 (s, 2H, -CH=N), 7.78 (d,  $J(\text{H,H})=5.7$  Hz, 2H, - $\text{C}_6\text{H}_4$ ), 6.94 (s, 4H, - $\text{C}_6\text{H}_2$ ), 6.68 (d,  $J(\text{H,H})=7.5$  Hz, 2H, - $\text{C}_6\text{H}_4$ ), 4.04 (m, 12H, - $\text{OCH}_2$ ), 1.80 (m, 12H, - $\text{OCH}_2\text{CH}_2$ ), 1.46-1.27 (m, 60H, - $[\text{CH}_2]_{60}$ ), 0.89 (t,  $J(\text{H,H})=6.9$  Hz, 18H, - $\text{CH}_3$ );  $^{13}\text{C}$  NMR (75 MHz,  $\text{CDCl}_3$ ,  $40^\circ\text{C}$ ):  $\delta_c$  166.55, 163.74, 163.28, 162.67, 155.42, 152.29, 133.55, 132.39, 131.06, 128.37, 114.37, 113.40, 110.75, 73.08, 68.37, 31.89, 29.54, 29.34, 29.07, 25.98, 22.67, 14.11; Elemental analyses: calculated for  $\text{C}_{69}\text{H}_{113}\text{N}_3\text{O}_7$  (%), C, 75.57; H, 10.39; N, 3.83; Found, C, 75.50; H, 10.31; N, 3.85.

2.37 Synthesis of *N*-(3,4,5-tris(decyloxy)benzylidene)-4-*-(3',4',5'-tris(decyloxy)benzylidene)amino*benzohydrazide (5, *n*=10)

Yield: 79 %. IR (KBr,  $\text{cm}^{-1}$ ): 3340  $\nu_s$  (N-H), 2924, 2853 (aliphatic C-H), 1643 (amide-I, C=O), 1576 (amide-II, N-H), 1620 (-C=N), 1599, 1502 (Ph), 1300, 1282 (OPh), 1011 (N-N);  $^1\text{H}$  NMR (300 MHz,  $\text{CDCl}_3/\text{DMSO-d}_6$ , 30°C):  $\delta$  10.00 (s, 1H, -NH), 8.15 (s, 2H, -CH=N), 7.77 (d,  $J(\text{H,H})=5.7$  Hz, 2H, -C<sub>6</sub>H<sub>4</sub>), 6.95 (s, 4H, -C<sub>6</sub>H<sub>2</sub>), 6.69 (d,  $J(\text{H,H})=7.5$  Hz, 2H, -C<sub>6</sub>H<sub>4</sub>), 4.02 (m, 12H, -OCH<sub>2</sub>), 1.79 (m, 12H, -OCH<sub>2</sub>CH<sub>2</sub>), 1.46-1.27 (m, 84H, -[CH<sub>2</sub>]<sub>42</sub>), 0.88 (t,  $J(\text{H,H})=6.9$  Hz, 18H, -CH<sub>3</sub>);  $^{13}\text{C}$  NMR (75 MHz,  $\text{CDCl}_3$ , 40°C):  $\delta_c$  166.55, 163.74, 163.28, 162.68, 155.42, 152.29, 133.55, 132.38, 131.06, 128.37, 114.37, 113.42, 110.75, 73.08, 68.37, 31.88, 29.54, 29.34, 29.07, 25.97, 22.67, 14.10; Elemental analyses: calculated for C<sub>81</sub>H<sub>137</sub>N<sub>3</sub>O<sub>7</sub> (%), C, 76.91; H, 10.92; N, 3.32; Found, C, 76.85; H, 10.85; N, 3.28.

2.38 Synthesis of *N*-(3,4,5-tris(dodecyloxy)benzylidene)-4-*-(3',4',5'-tris(dodecyloxy)benzylidene)amino*benzohydrazide (5, *n*=12)

Yield: 76 %. IR (KBr,  $\text{cm}^{-1}$ ): 3342  $\nu_s$  (N-H), 2926, 2849 (aliphatic C-H), 1640 (amide-I, C=O), 1573 (amide-II, N-H), 1623 (-C=N), 1596, 1503 (Ph), 1305, 1281 (OPh), 1013 (N-N);  $^1\text{H}$  NMR (300 MHz,  $\text{CDCl}_3/\text{DMSO-d}_6$ , 30°C):  $\delta$  10.04 (s, 1H, -NH), 8.12 (s, 2H, -CH=N), 7.74 (d,  $J(\text{H,H})=5.7$  Hz, 2H, -C<sub>6</sub>H<sub>4</sub>), 6.95 (s, 4H, -C<sub>6</sub>H<sub>2</sub>), 6.70 (d,  $J(\text{H,H})=7.5$  Hz, 2H, -C<sub>6</sub>H<sub>4</sub>), 4.03 (m, 12H, -OCH<sub>2</sub>), 1.78 (m, 12H, -OCH<sub>2</sub>CH<sub>2</sub>), 1.46-1.26 (m, 108H, -[CH<sub>2</sub>]<sub>54</sub>), 0.90 (t,  $J(\text{H,H})=6.9$  Hz, 18H, -CH<sub>3</sub>);  $^{13}\text{C}$  NMR (75 MHz,  $\text{CDCl}_3$ , 40°C):  $\delta_c$  166.54, 163.74, 163.28, 162.69, 155.42, 152.29, 133.54, 132.38, 131.06, 128.36, 114.37, 113.42, 110.77, 73.08, 68.37, 31.87, 29.54, 29.35, 29.07, 25.97, 22.67, 14.10; Elemental analyses: calculated for C<sub>93</sub>H<sub>161</sub>N<sub>3</sub>O<sub>7</sub> (%), C, 77.93; H, 11.32; N, 2.93; Found, C, 77.82; H, 11.27; N, 2.88.

2.39 Synthesis of *N*-(3,4,5-tris(tetradecyloxy)benzylidene)-4-*-(3',4',5'-tris(tetradecyloxy)benzylidene)amino*benzohydrazide (5, *n*=14)

Yield: 74 %. IR (KBr,  $\text{cm}^{-1}$ ): 3341  $\nu_s$  (N-H), 2923, 2853 (aliphatic C-H), 1641 (amide-I, C=O), 1575 (amide-II, N-H), 1621 (-C=N), 1599, 1501 (Ph), 1303, 1282 (OPh), 1015 (N-N);  $^1\text{H}$  NMR (300 MHz,  $\text{CDCl}_3/\text{DMSO-d}_6$ , 30°C):  $\delta$  10.01 (s, 1H, -NH), 8.14 (s, 2H, -CH=N), 7.76 (d,  $J(\text{H,H})=5.7$  Hz, 2H, -C<sub>6</sub>H<sub>4</sub>), 6.93 (s, 4H, -C<sub>6</sub>H<sub>2</sub>), 6.67 (d,  $J(\text{H,H})=7.5$  Hz, 2H, -C<sub>6</sub>H<sub>4</sub>), 4.01 (m, 12H, -OCH<sub>2</sub>), 1.77 (m, 12H, -OCH<sub>2</sub>CH<sub>2</sub>), 1.46-1.27 (m, 132H, -[CH<sub>2</sub>]<sub>66</sub>), 0.89 (t,  $J(\text{H,H})=6.9$  Hz, 18H, -CH<sub>3</sub>);  $^{13}\text{C}$  NMR (75 MHz,  $\text{CDCl}_3$ , 40°C):  $\delta_c$  166.55, 163.73, 163.28, 162.67, 155.42, 152.28, 133.55, 132.37, 131.06, 128.37, 114.35, 113.42, 110.74, 73.08, 68.36, 31.88, 29.54, 29.34, 29.07, 25.97, 22.67, 14.10; Elemental analyses: calculated for C<sub>105</sub>H<sub>185</sub>N<sub>3</sub>O<sub>7</sub> (%), C, 78.74; H, 11.64; N, 2.62; Found, C, 78.66; H, 11.59; N, 2.59.

2.40 Synthesis of *N*-(3,4,5-tris(hexadecyloxy)benzylidene)-4-*-(3',4',5'-tris(hexadecyloxy)benzylidene)amino*benzohydrazide (5, *n*=16)

Yield: 78 %. IR (KBr,  $\text{cm}^{-1}$ ): 3344  $\nu_s$  (N-H), 2924, 2851 (aliphatic C-H), 1644 (amide-I, C=O), 1574 (amide-II, N-H), 1620 (-C=N), 1595, 1504 (Ph), 1300, 1283 (OPh), 1009 (N-N);  $^1\text{H}$  NMR (300 MHz,  $\text{CDCl}_3/\text{DMSO-d}_6$ , 30°C):  $\delta$  9.99 (s, 1H, -NH), 8.11 (s, 2H, -CH=N), 7.73 (d,  $J(\text{H,H})=5.7$  Hz, 2H, -C<sub>6</sub>H<sub>4</sub>), 6.98 (s, 4H, -C<sub>6</sub>H<sub>2</sub>), 6.65 (d,  $J(\text{H,H})=7.5$  Hz, 2H, -C<sub>6</sub>H<sub>4</sub>), 4.05 (m, 12H, -OCH<sub>2</sub>), 1.81 (m, 12H, -OCH<sub>2</sub>CH<sub>2</sub>), 1.45-1.26 (m, 156H, -[CH<sub>2</sub>]<sub>78</sub>), 0.90 (t,  $J(\text{H,H})=6.9$  Hz, 18H, -CH<sub>3</sub>);  $^{13}\text{C}$  NMR (75 MHz,  $\text{CDCl}_3$ , 40°C):  $\delta_c$  166.53, 163.74, 163.29, 162.68, 155.43, 152.29, 133.56, 132.38, 131.07, 128.39, 114.37, 113.43, 110.75, 73.09, 68.37, 31.88, 29.54,

29.34, 29.07, 25.97, 22.67, 14.10; Elemental analyses: calculated for C<sub>117</sub>H<sub>209</sub>N<sub>3</sub>O<sub>7</sub> (%), C, 79.40; H, 11.90; N, 2.37; Found, C, 79.31; H, 11.87; N, 2.32.

## References:

- S1** A. Weisberger and F. S. Praskver, in *Organic Solvents*, International publishers Inc., New York, 1956, pp. 1263.
- S2** M. J. Frisch, G. W. Trucks, H. B. Schlegel, G. E. Scuseria, M. A. Robb, J. R. Cheeseman, G. Scalmani, V. Barone, B. Mennucci, G. A. Petersson, H. Nakatsuji, M. Caricato, X. Li, H. P. Hratchian, A. F. Izmaylov, J. Bloino, G. Zheng, J. L. Sonnenberg, M. Hada, M. Ehara, K. Toyota, R. Fukuda, J. Hasegawa, M. Ishida, T. Nakajima, Y. Honda, O. Kitao, H. Nakai, T. Vreven, J. A. Montgomery, Jr., J. E. Peralta, F. Ogliaro, M. Bearpark, J. J. Heyd, E. Brothers, K. N. Kudin, V. N. Staroverov, R. Kobayashi, J. Normand, K. Raghavachari, A. Rendell, J. C. Burant, S. S. Iyengar, J. Tomasi, M. Cossi, N. Rega, J. M. Millam, M. Klene, J. E. Knox, J. B. Cross, V. Bakken, C. Adamo, J. Jaramillo, R. Gomperts, R. E. Stratmann, O. Yazyev, A. J. Austin, R. Cammi, C. Pomelli, J. W. Ochterski, R. L. Martin, K. Morokuma, V. G. Zakrzewski, G. A. Voth, P. Salvador, J. J. Dannenberg, S. Dapprich, A. D. Daniels, Ö. Farkas, J. B. Foresman, J. V. Ortiz, J. Cioslowski, and D. J. Fox, *Gaussian 09 (Revision A.02)*, Gaussian, Inc., Wallingford CT, 2009.
- S3** A.D. Becke, *J. Chem. Phys.*, 1993, 98, 5648.
- S4** C. Lee, W. Yang and R.G. Parr, *Phys. Rev. B*, 1988, 37, 785.
- S5** R. Dennington II, T. Keith, J. Millam, K. Eppinnett, W. L. Hovell and R. Gilliland, *Gauss View 03*, Semichem, Inc., Shawnee Mission, KS. 2003.

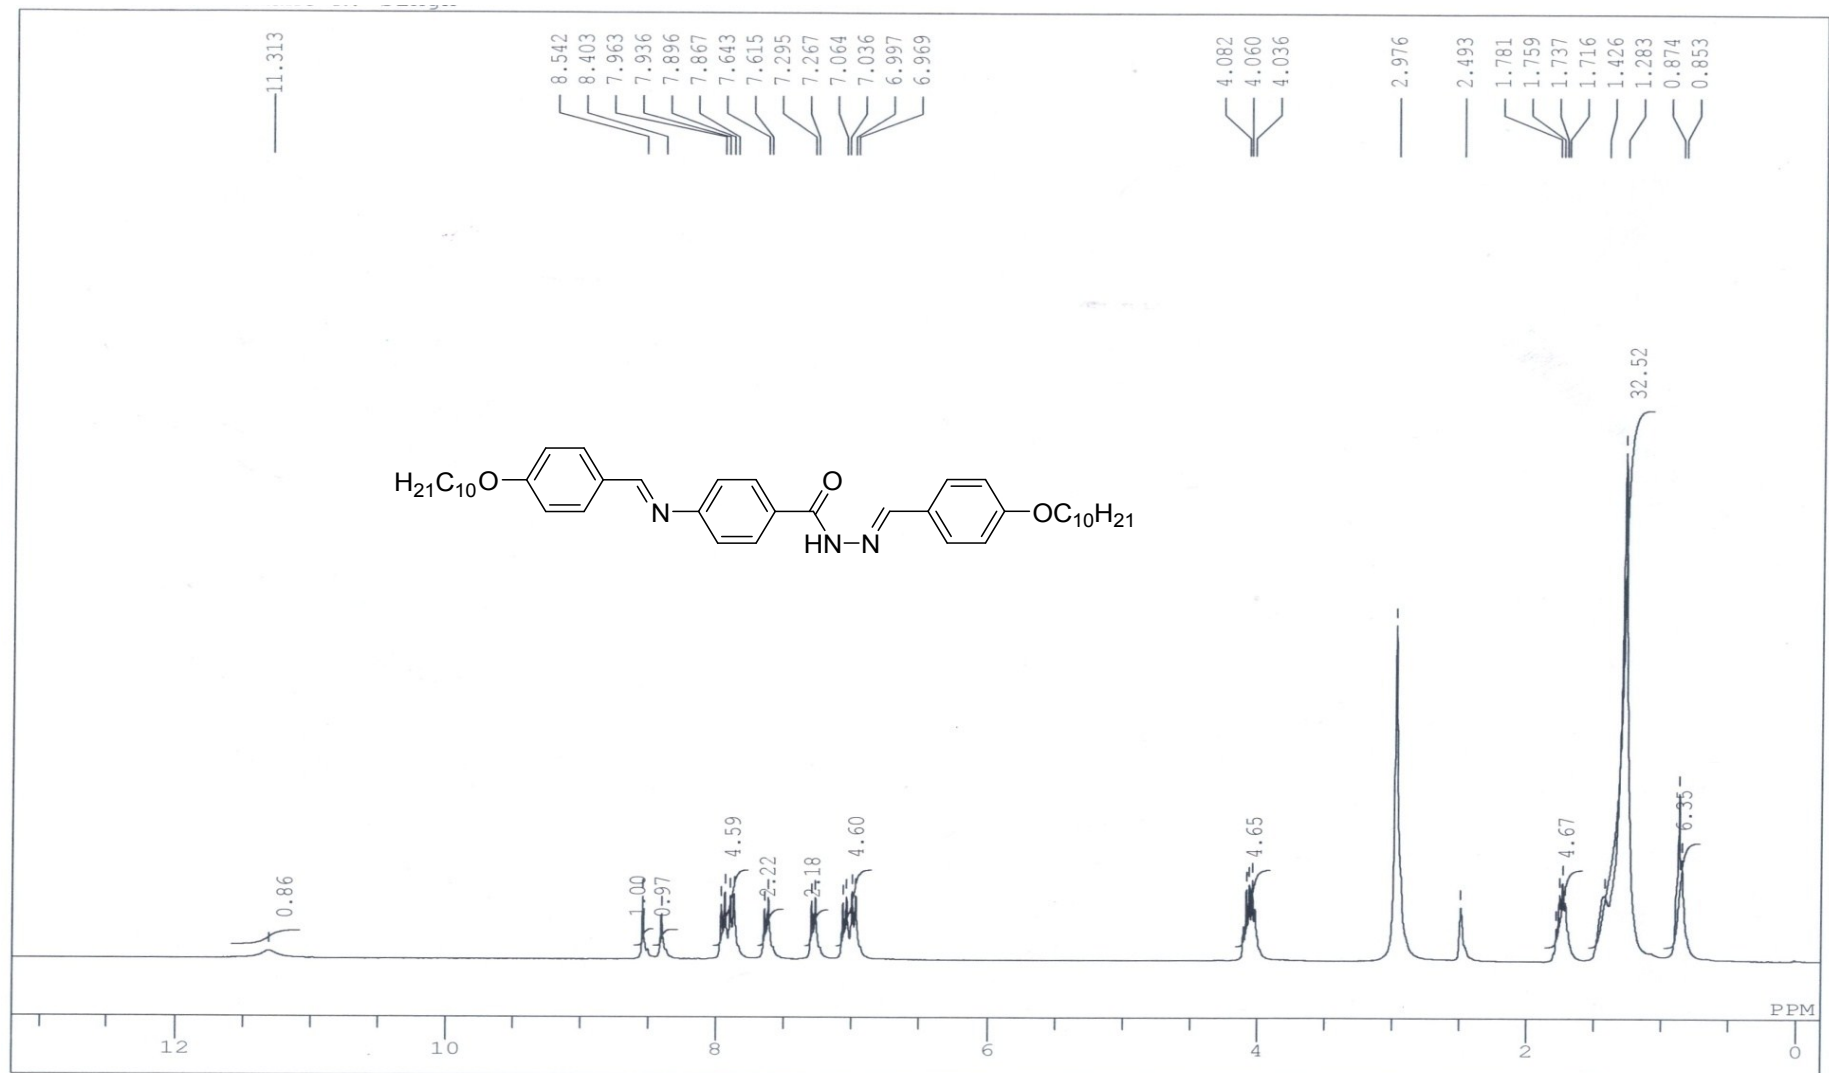

**Fig. SI 1** <sup>1</sup>H NMR spectrum of N-(4-(decyloxy)benzylidene)-4-((4'-(decyloxy)benzylidene)amino)benzohydrazide, **1** (n=10)

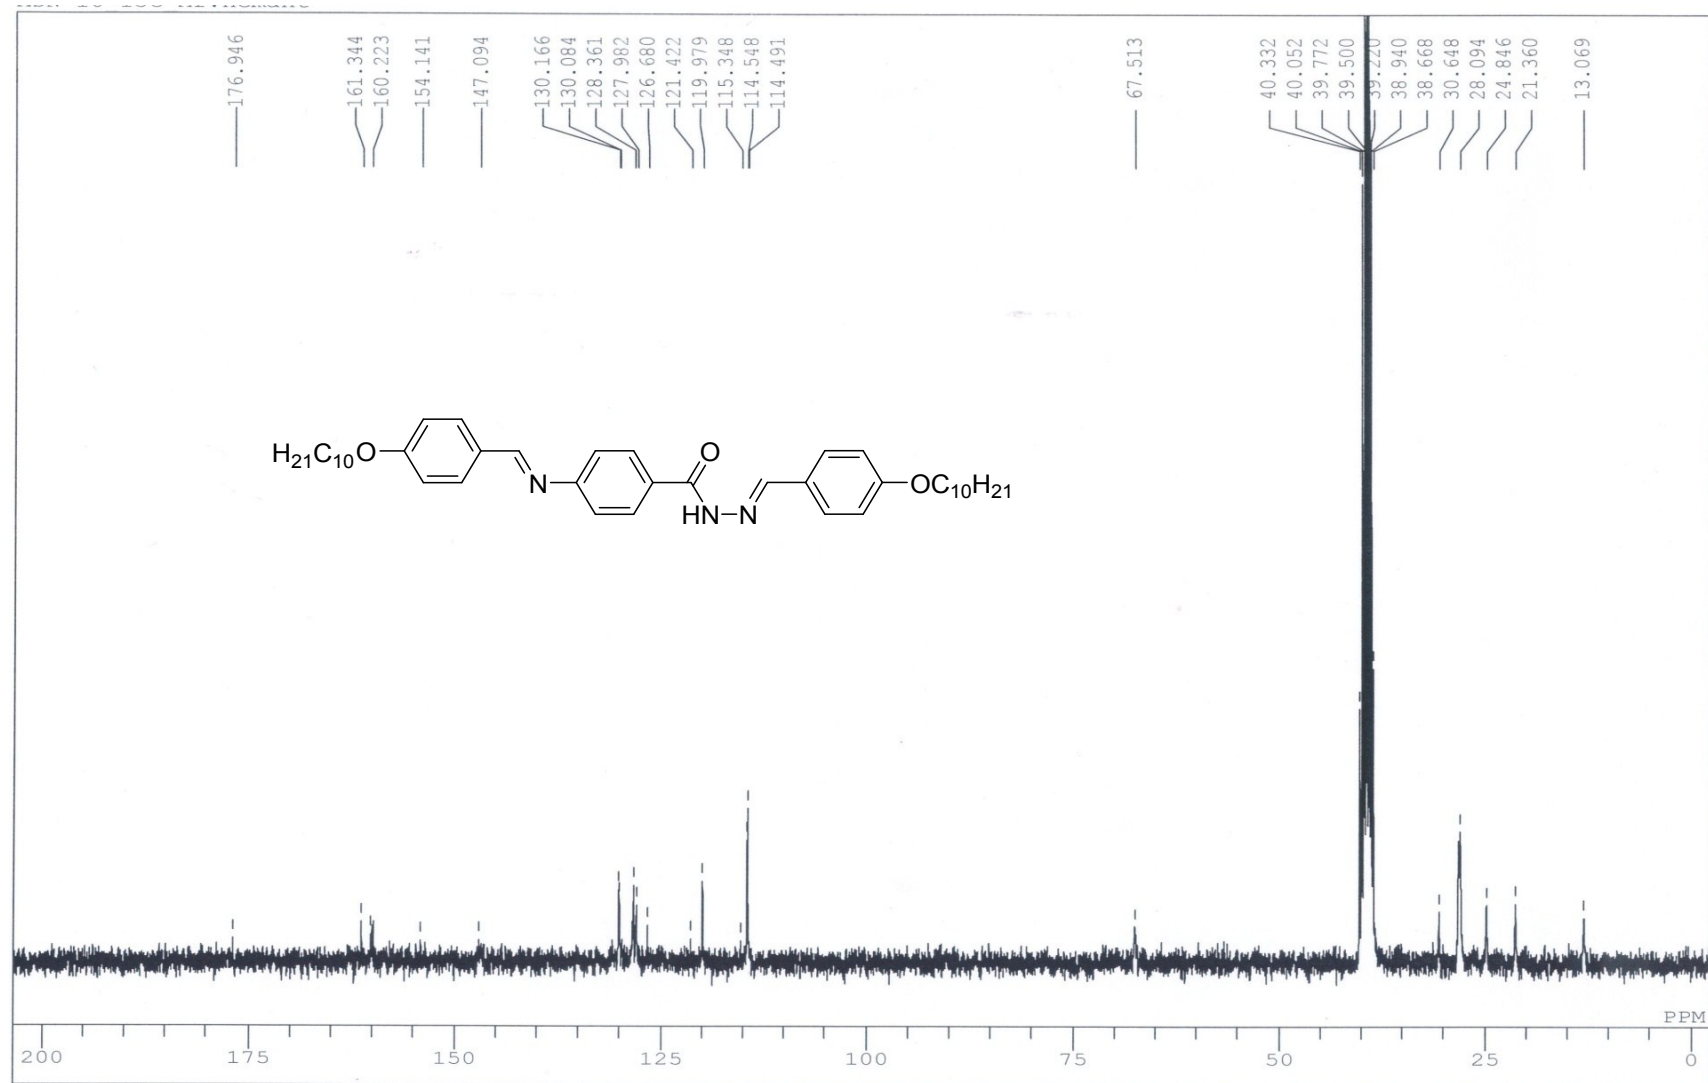

**Fig. SI 2** <sup>13</sup>C NMR spectrum of N-(4-(decyloxy)benzylidene)-4-((4'-(decyloxy)benzylidene)amino)benzohydrazide, **1** (n=10)



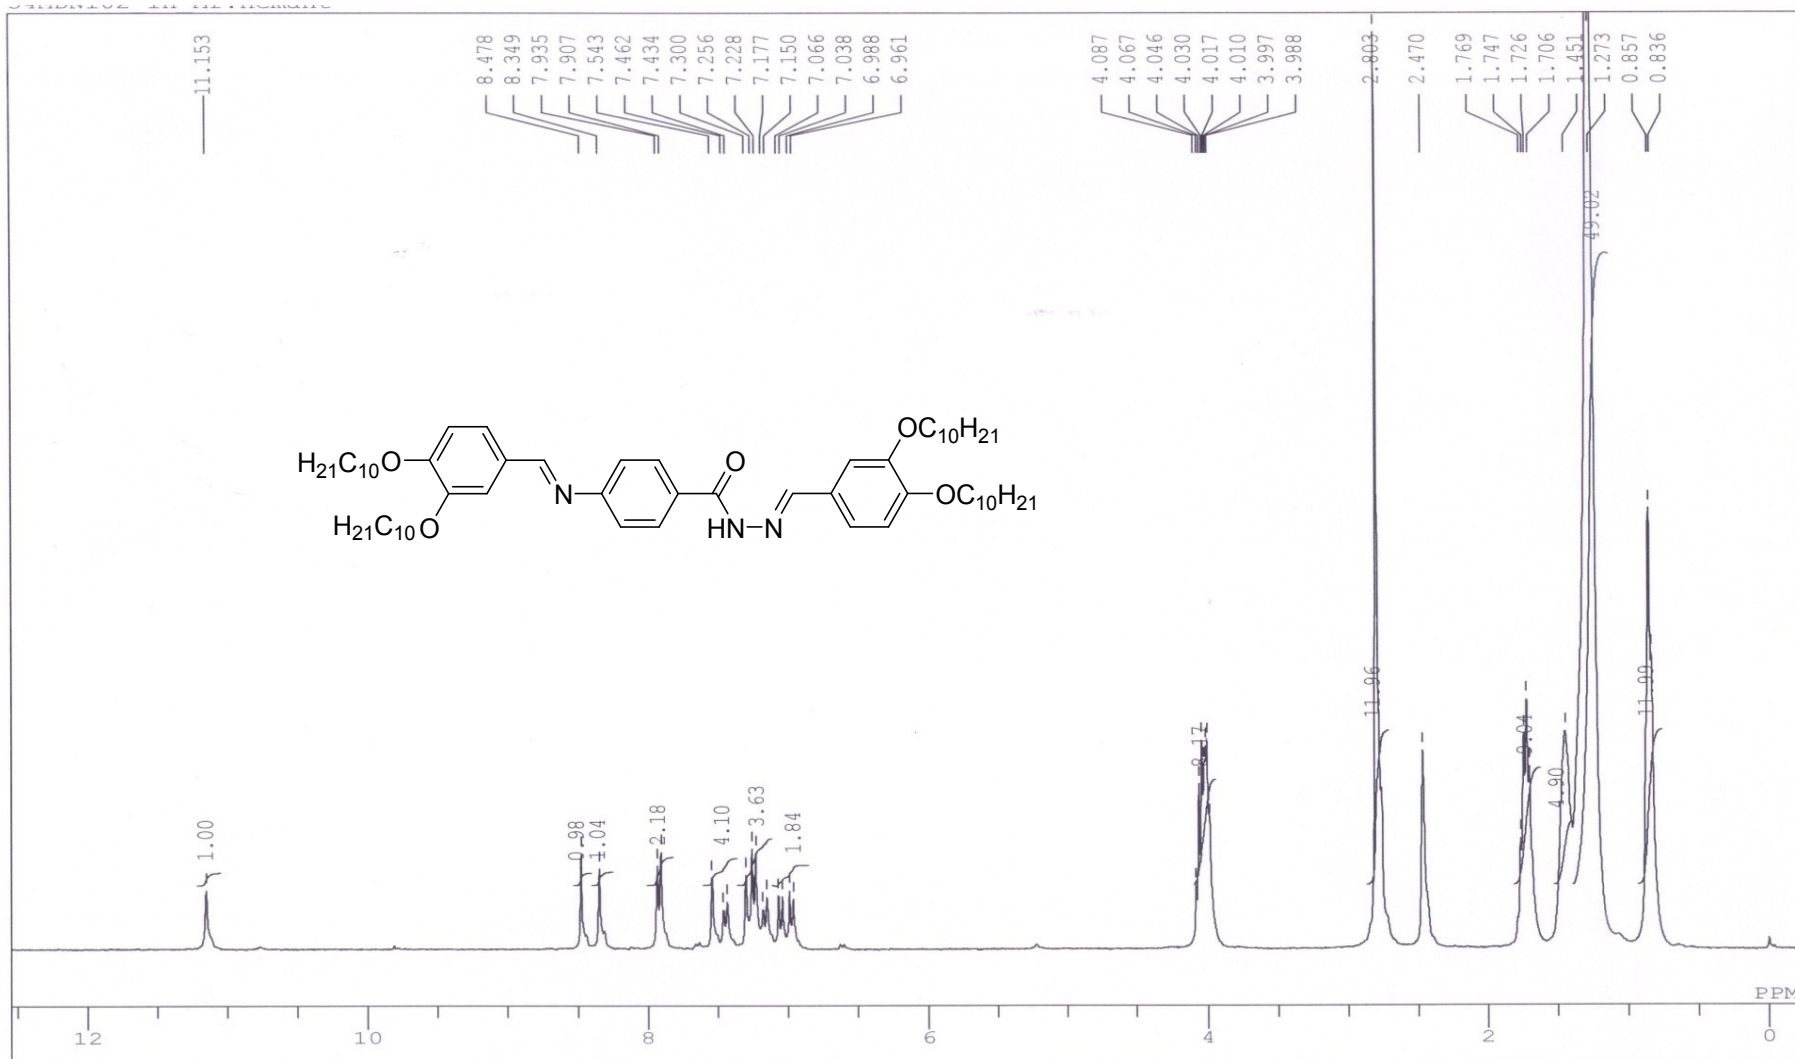

**Fig. SI 3** <sup>1</sup>H NMR spectrum of N-(3,4-bis(decyloxy)benzylidene)-4-((3',4'-bis(decyloxy)benzylidene)amino)benzohydrazide, 2 (n=10)

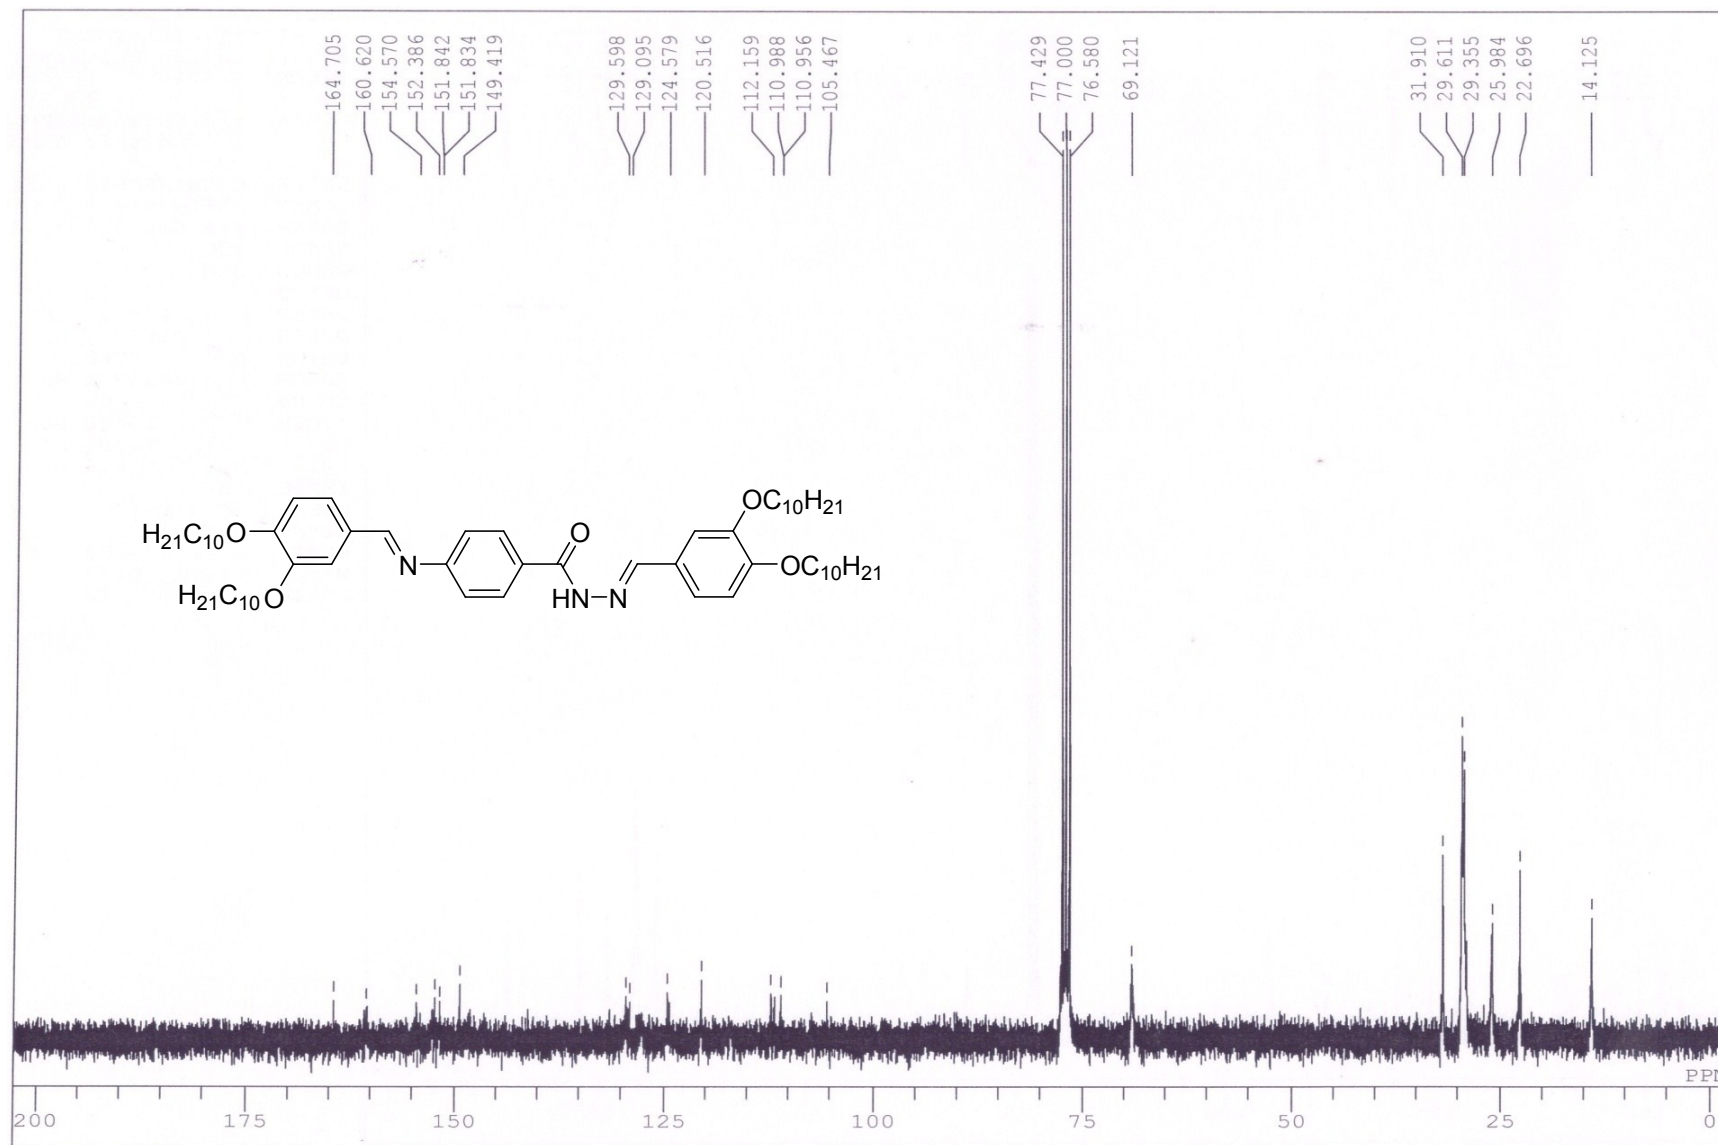

**Fig. SI 4** <sup>13</sup>C NMR spectrum of N-(3,4-bis(decyloxy)benzylidene)-4-((3',4'-bis(decyloxy)benzylidene)amino)benzohydrazide, **2** (n=10)

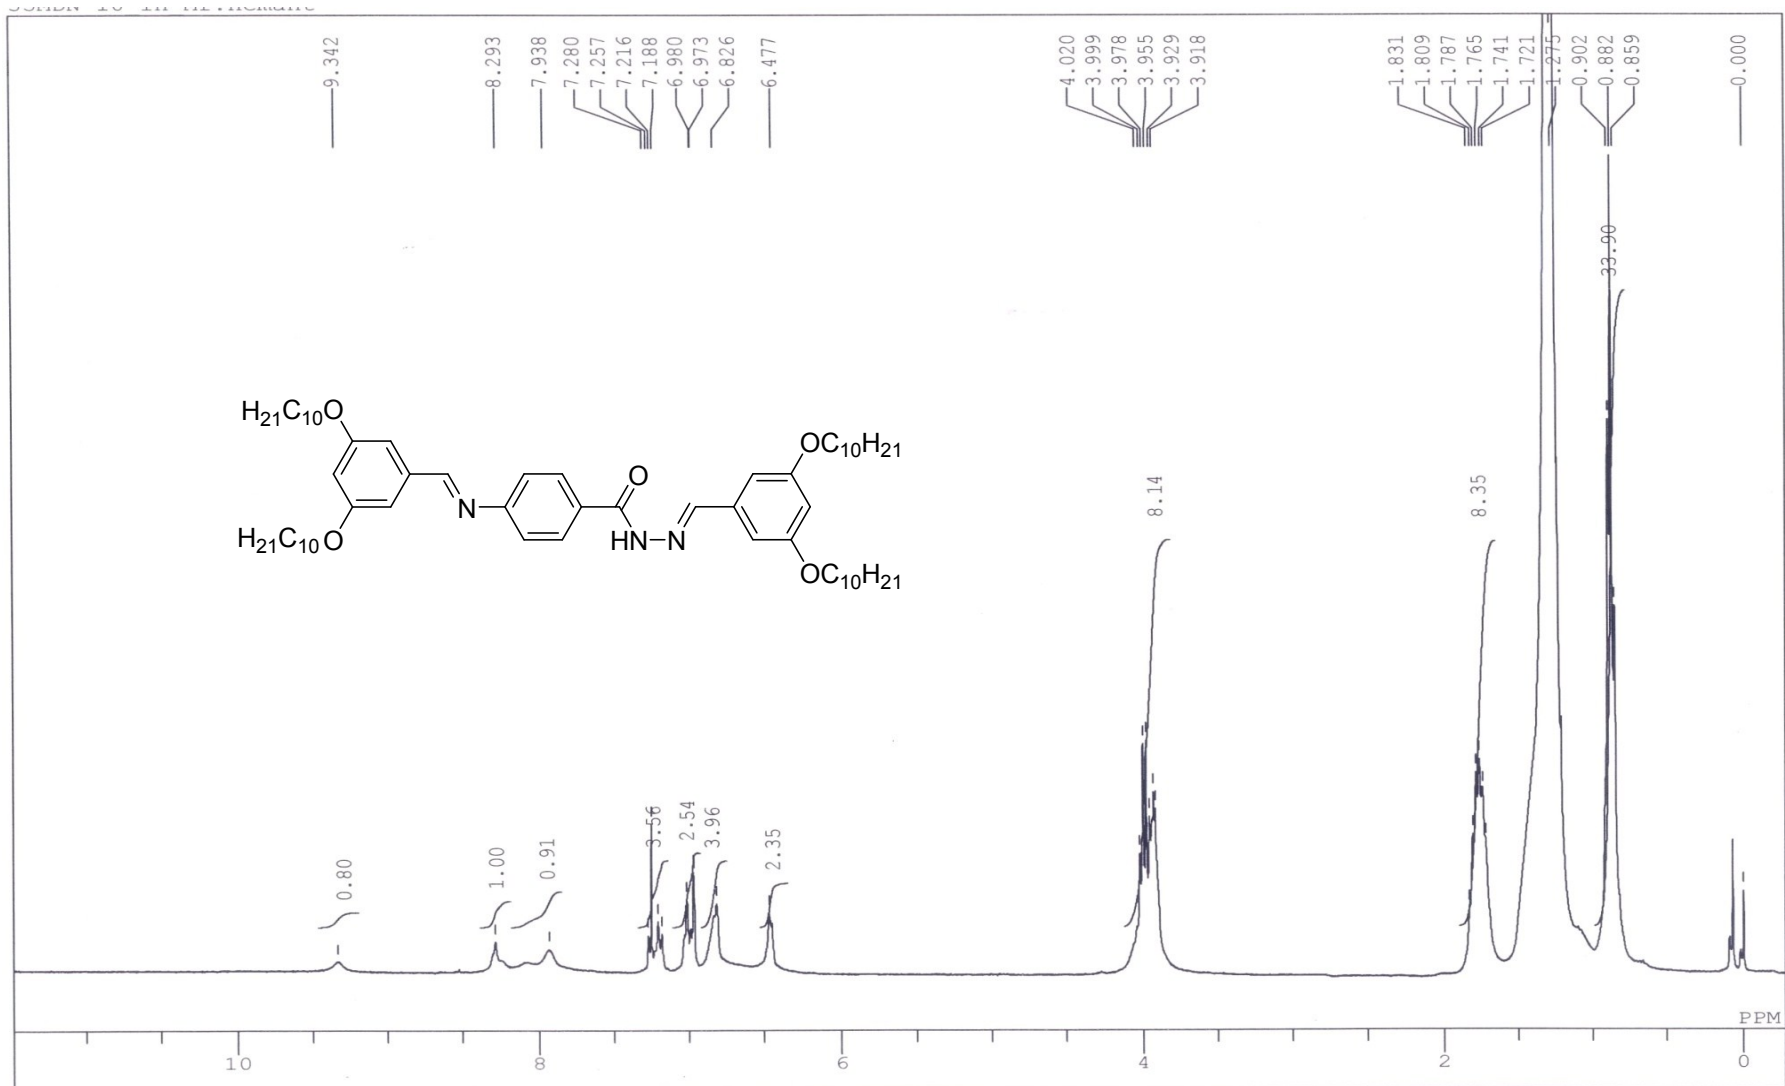

**Fig. SI 5** <sup>1</sup>H NMR spectrum of N-(3,5-bis(decyloxy)benzylidene)-4-((3',5'-bis(decyloxy)benzylidene)amino)benzohydrazide, **3** (n=10)

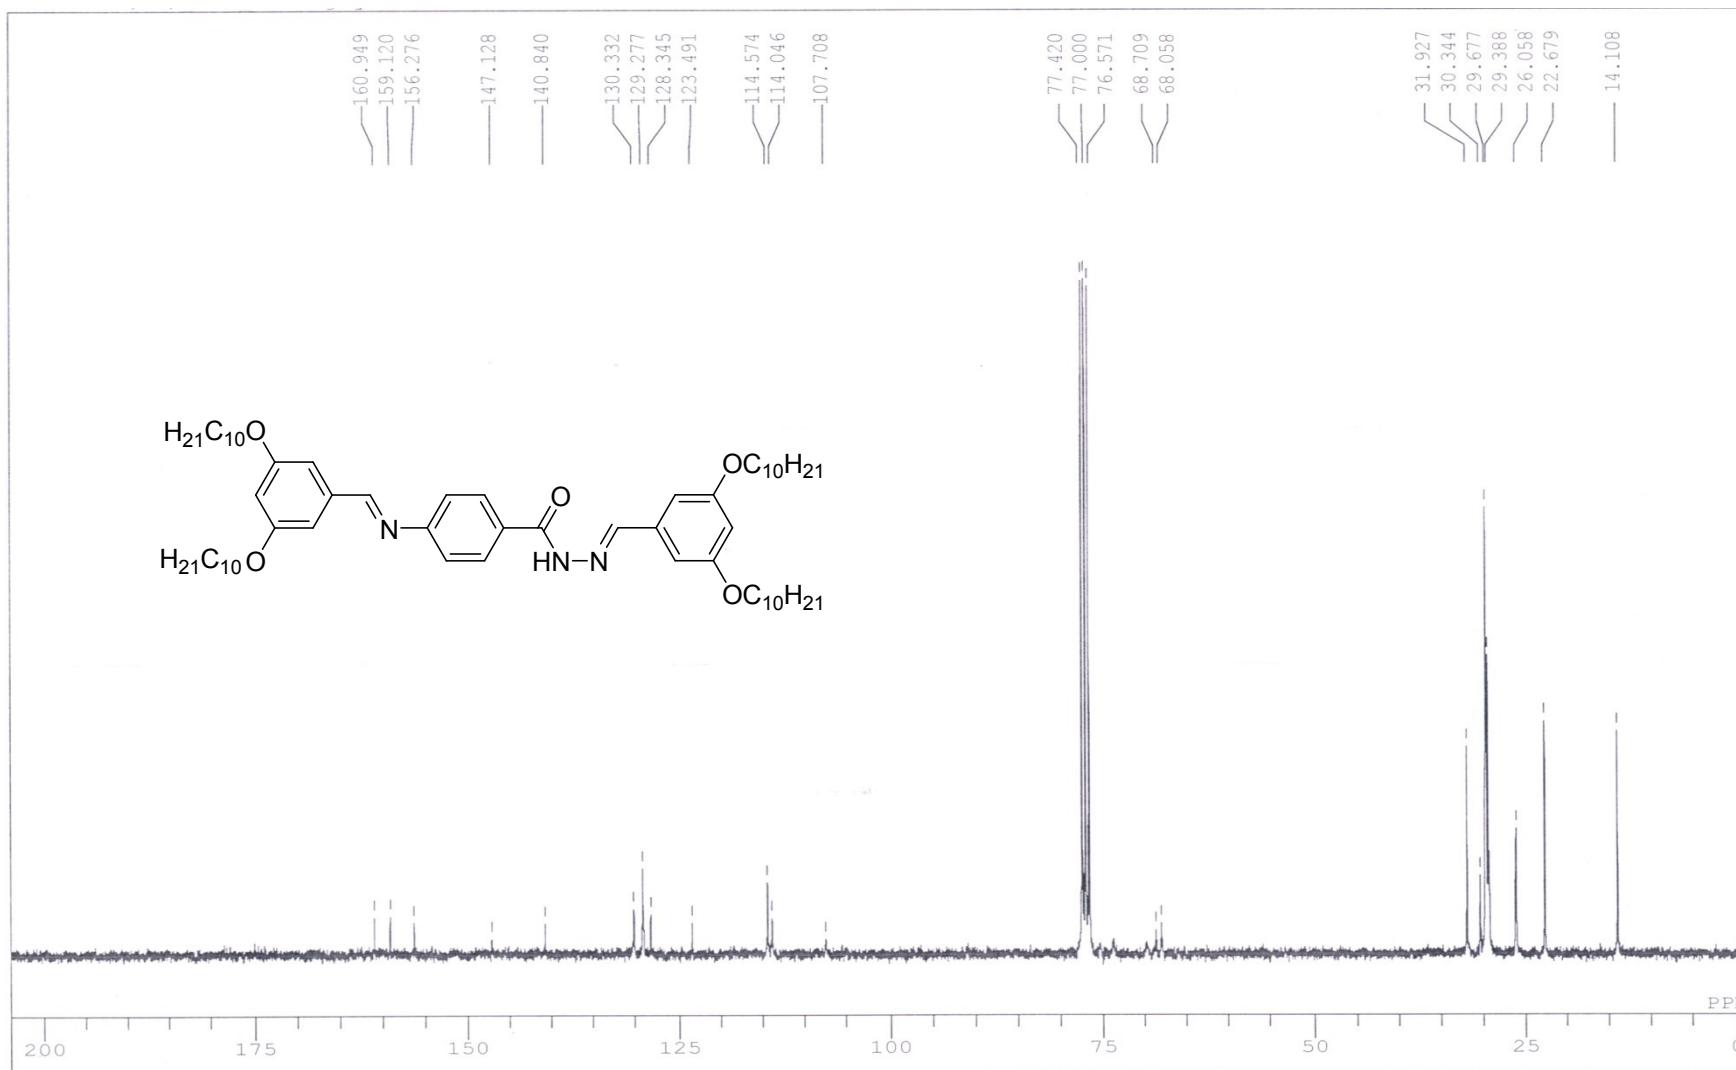

**Fig. SI 6** <sup>13</sup>C NMR spectrum of N-(3,5-bis(decyloxy)benzylidene)-4-((3',5'-bis(decyloxy)benzylidene)amino)benzohydrazide, **3** (n=10)

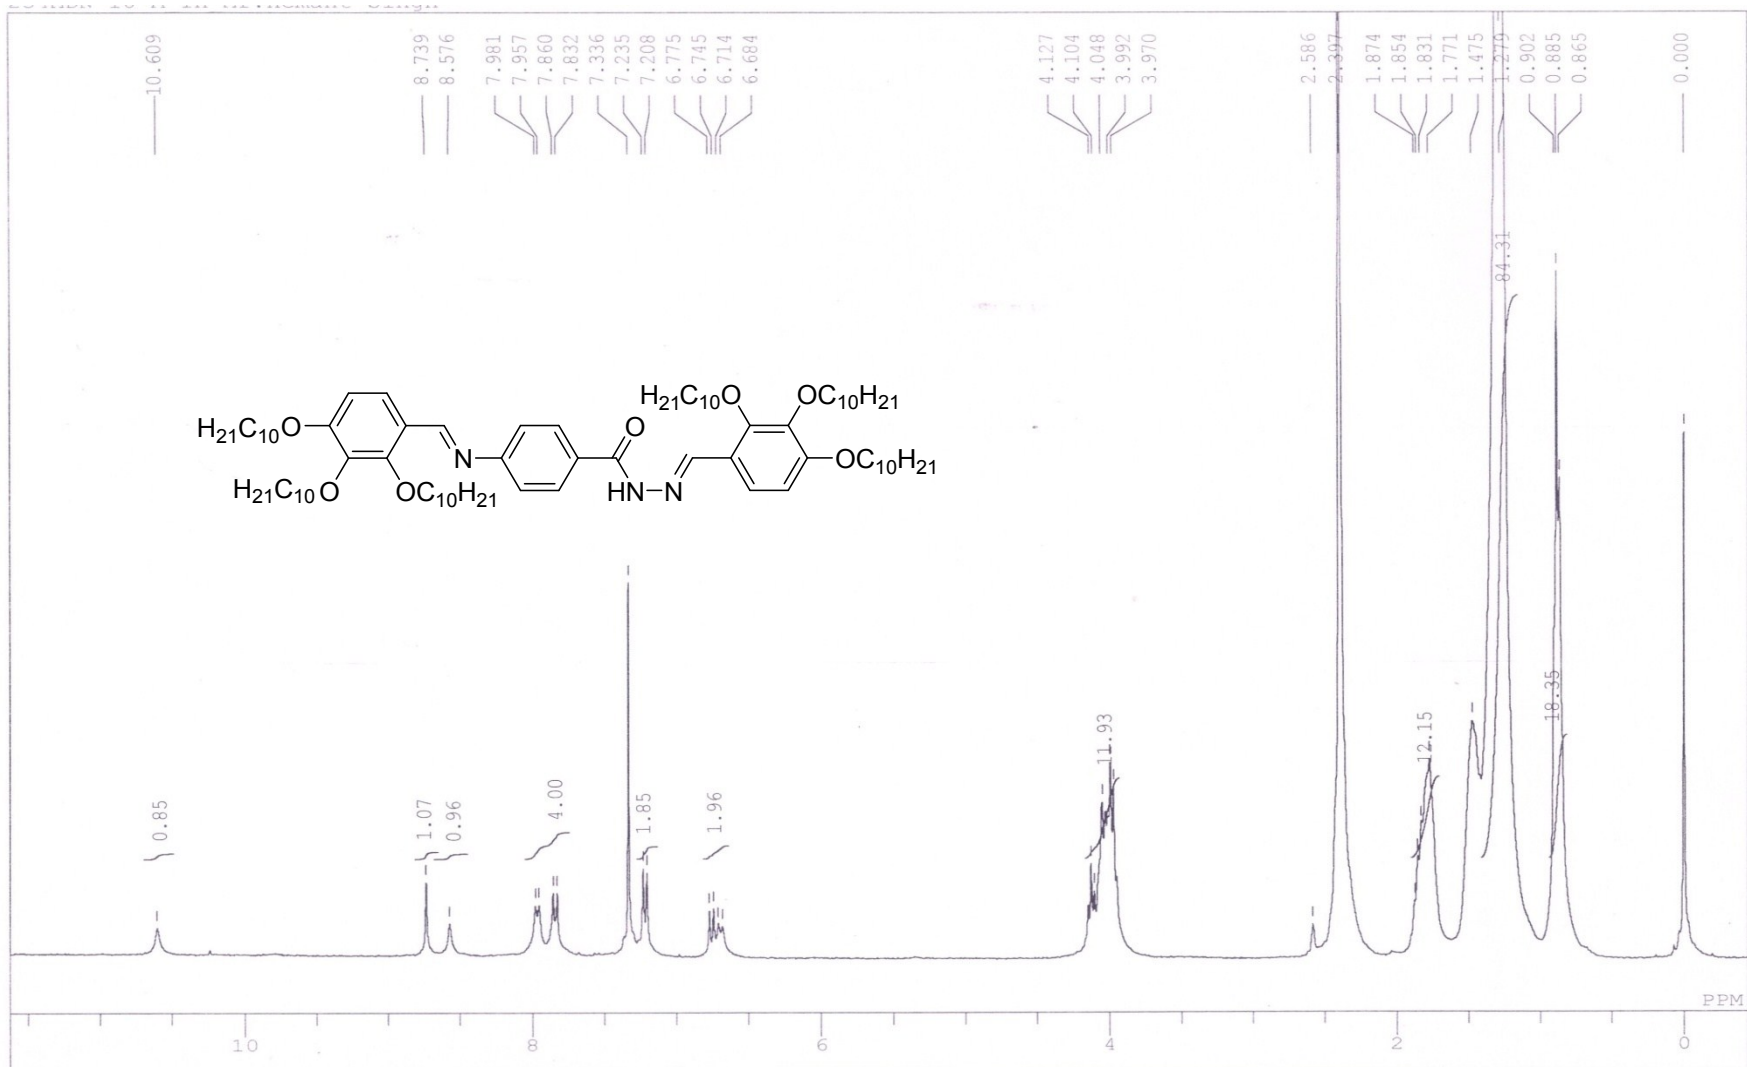

**Fig. SI 7** <sup>1</sup>H NMR spectrum of N-(2,3,4-tris(decyloxy)benzylidene)-4-((2',3',4'-tris(decyloxy)benzylidene)amino)benzohydrazide, **4** (n=10)

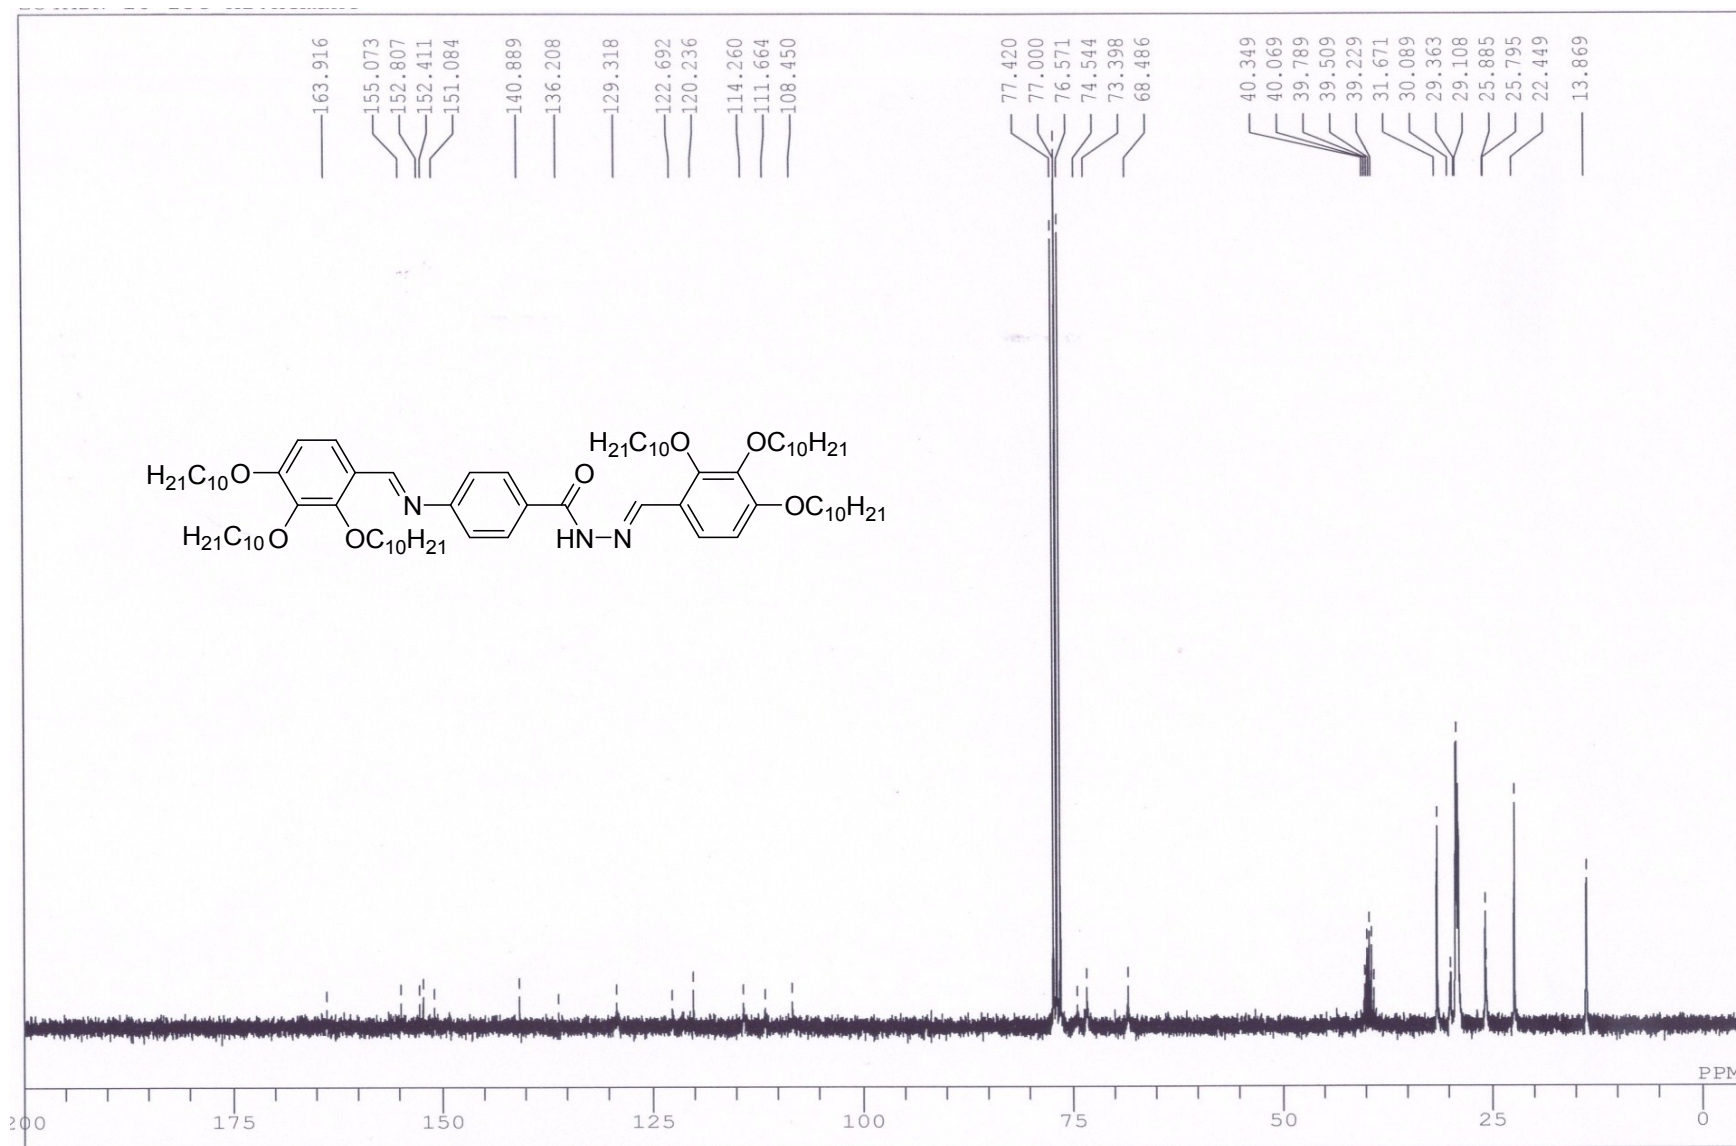

**Fig. SI 8**  $^{13}\text{C}$  NMR spectrum of N-(2,3,4-tris(decyloxy)benzylidene)-4-((2',3',4'-tris(decyloxy)benzylidene)amino)benzohydrazide, **4** (n=10)

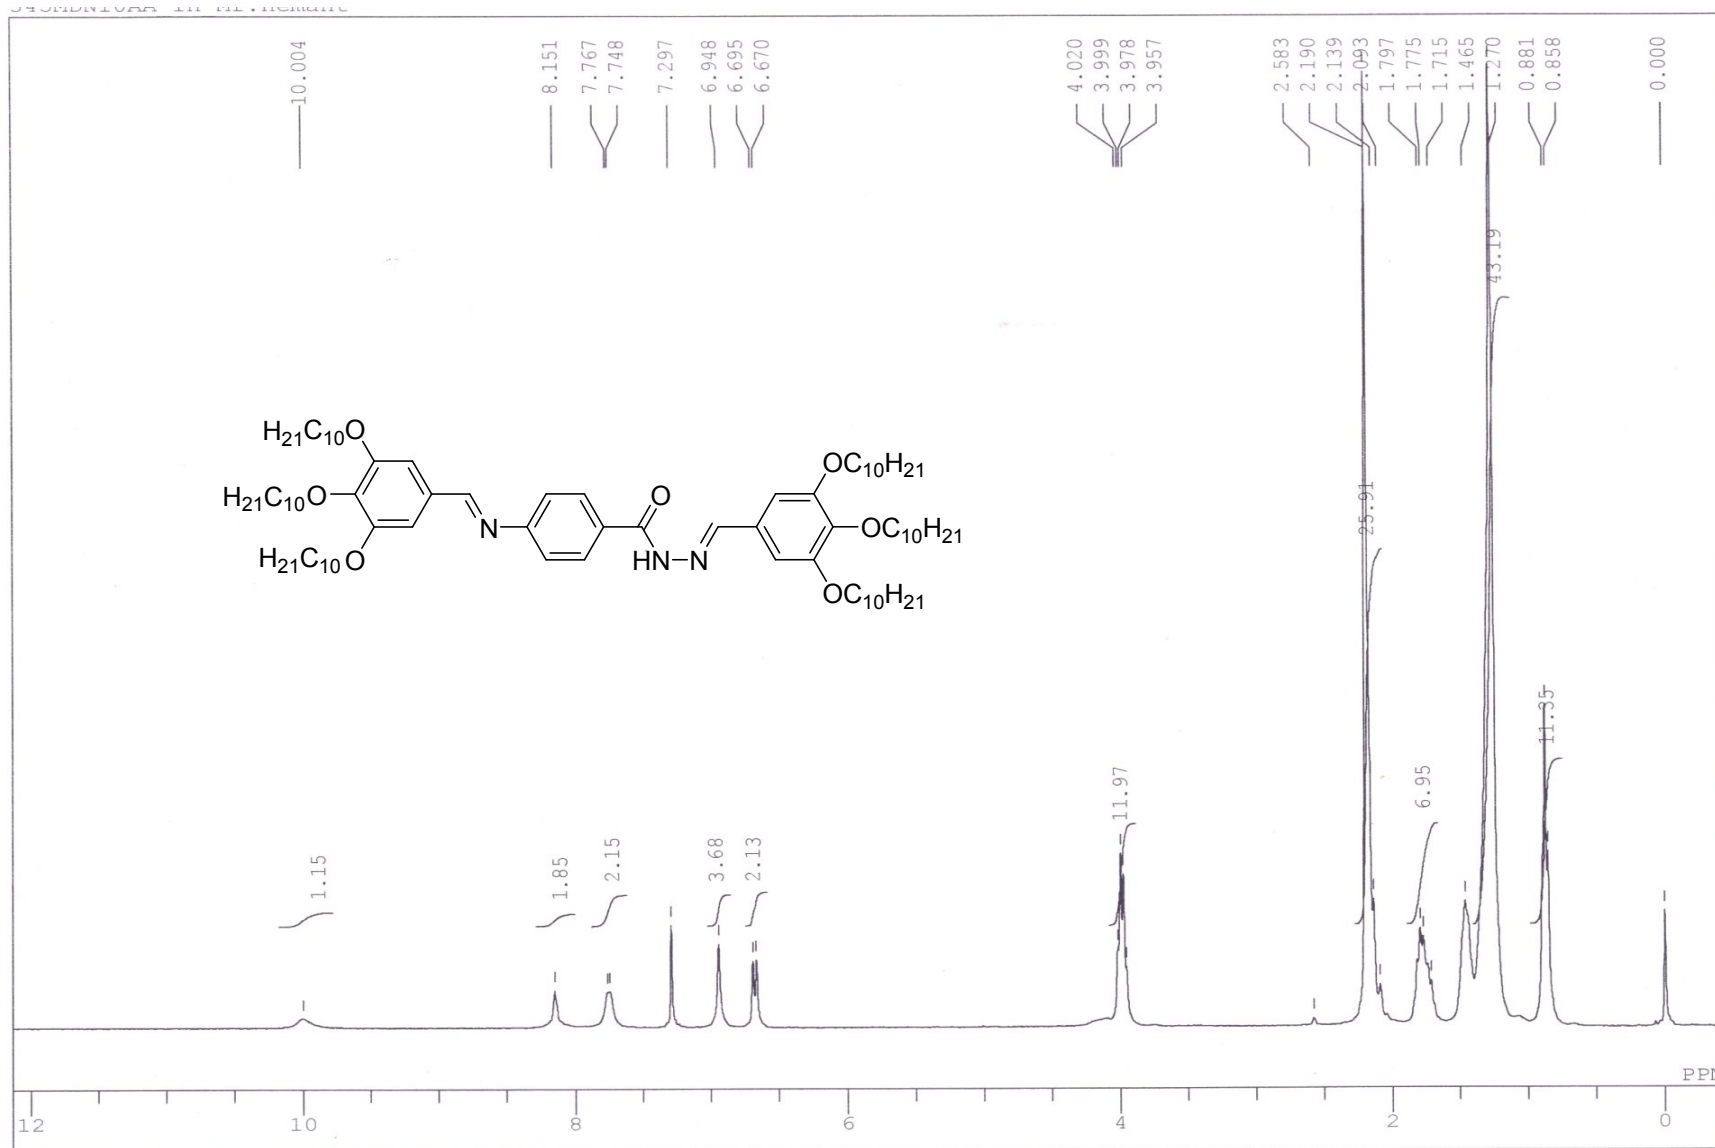

**Fig. SI 9** <sup>1</sup>H NMR spectrum of N-(3,4,5-tris(decyloxy)benzylidene)-4-((3',4',5'-tris(decyloxy)benzylidene)amino)benzohydrazide, **5** ( $n=10$ )

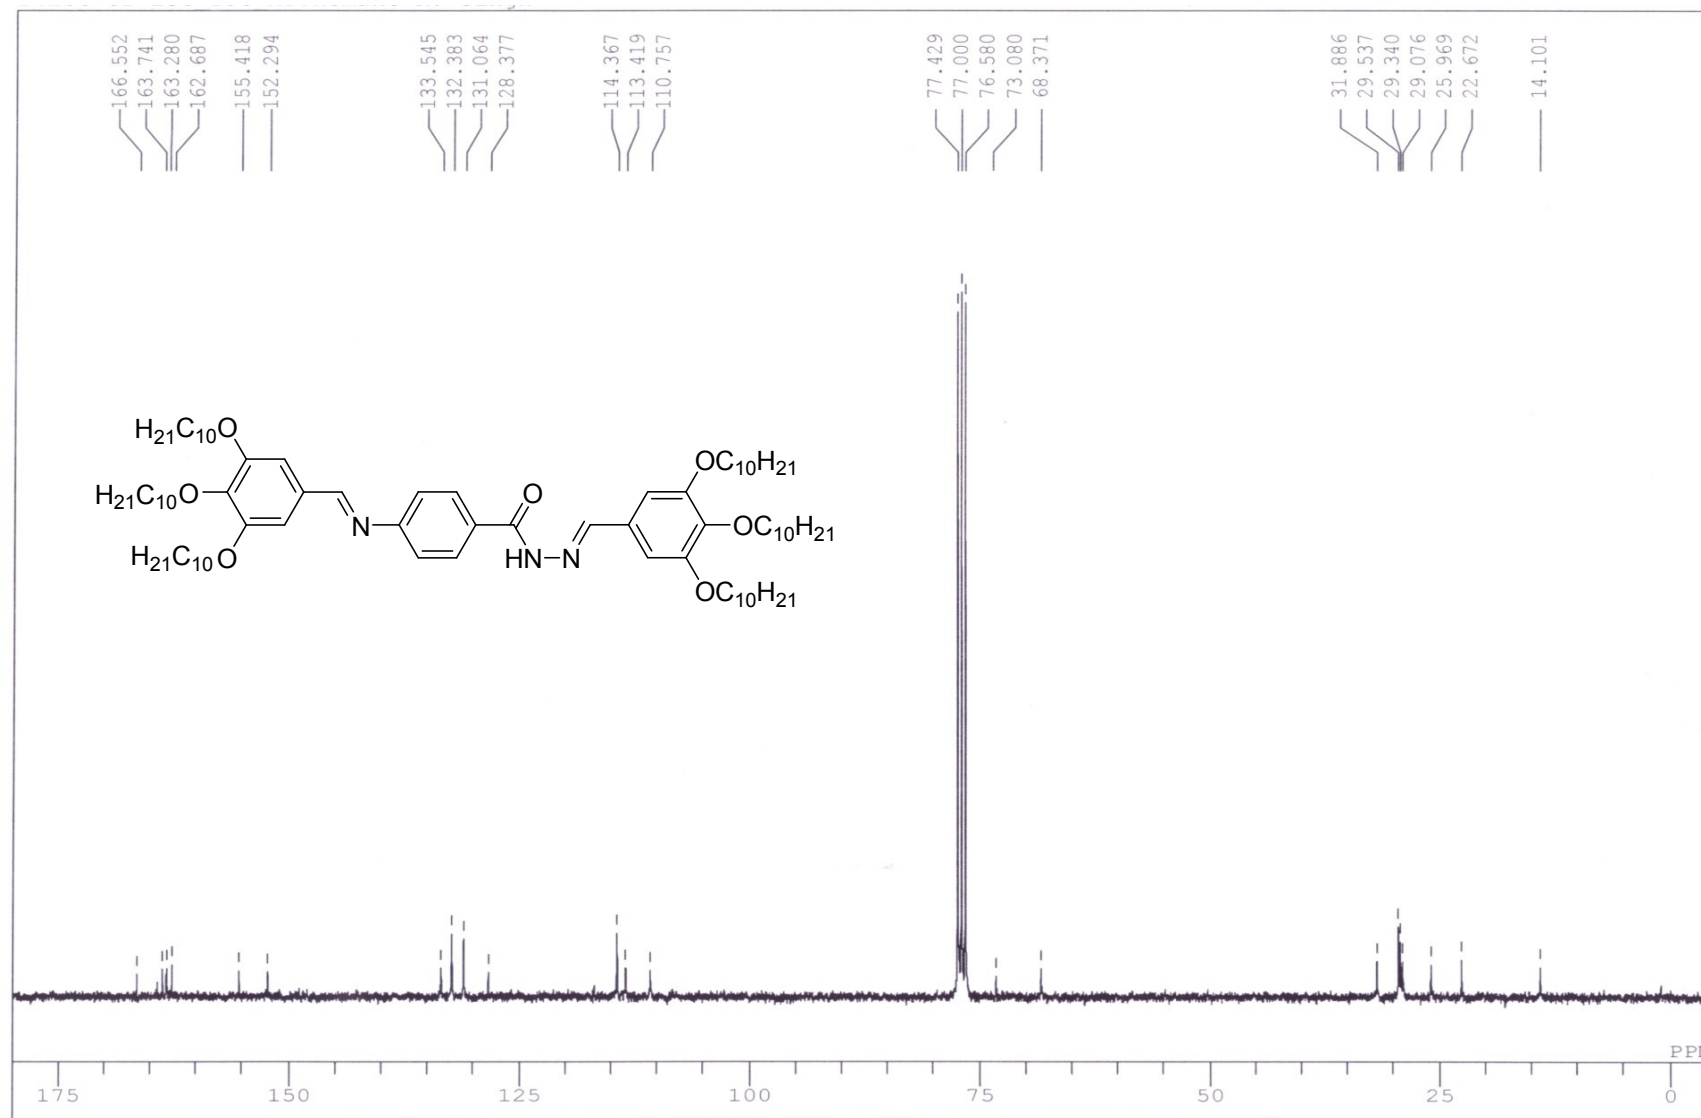

**Fig. SI 10** <sup>13</sup>C NMR spectrum of N-(3,4,5-tris(decyloxy)benzylidene)-4-((3',4',5'-tris(decyloxy)benzylidene)amino)benzohydrazide, **5** (n=10)



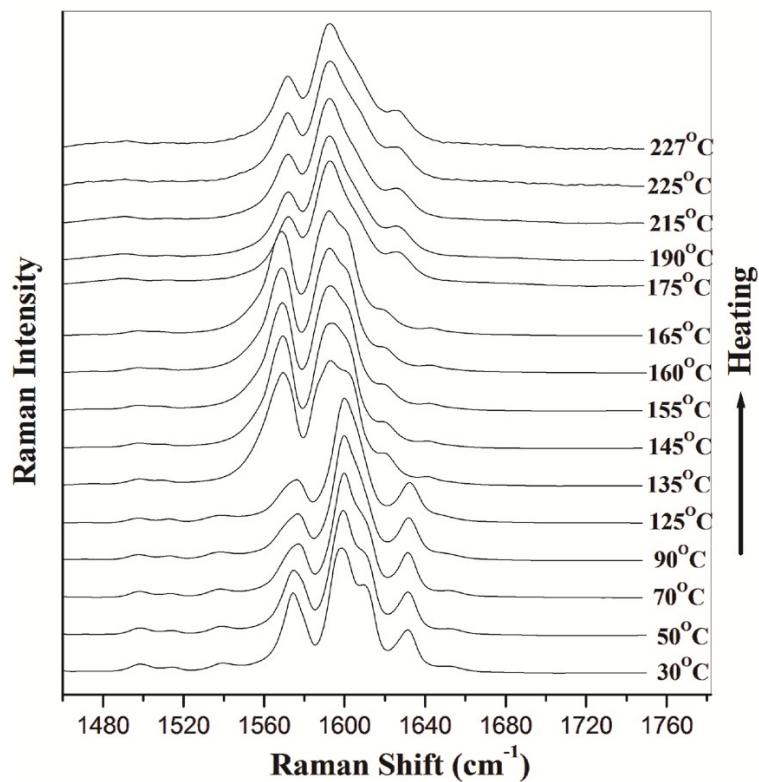

(a)

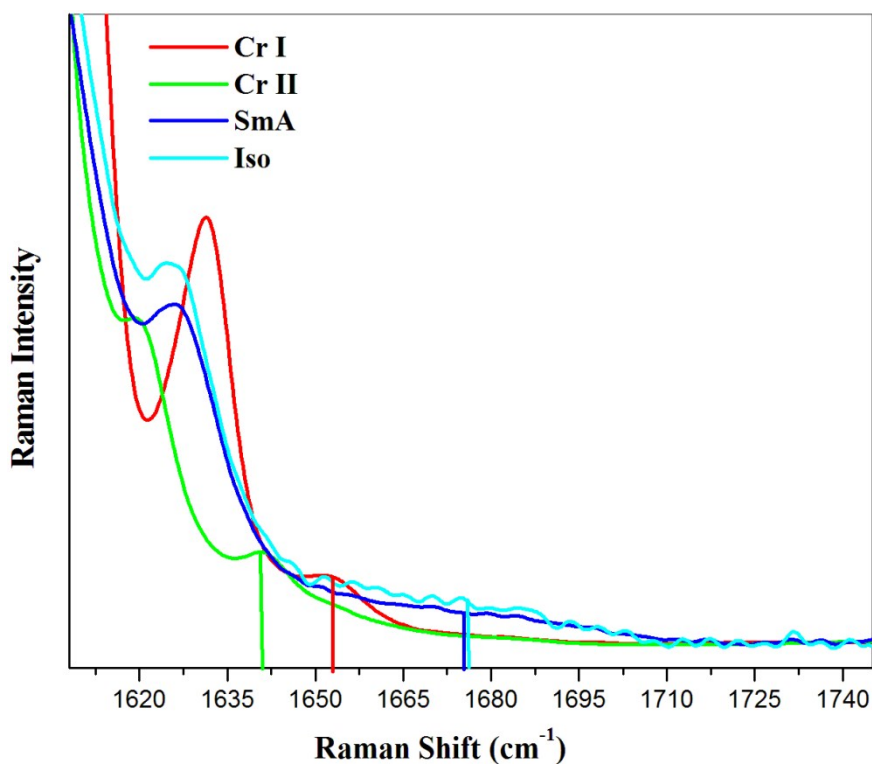

(b)

**Fig. SI 11** Raman Spectra of compound N-(4-(dodecyloxy)benzylidene)-4-((4'-(dodecyloxy)benzylidene)amino)benzohydrazide, **1** ( $n=12$ ) at different phases (Cr  $\rightarrow$  Cr' 171.6  $^{\circ}$ C  $\rightarrow$  SmA 221.8  $^{\circ}$ C  $\rightarrow$  i) (a) 1460-1740  $\text{cm}^{-1}$  and (b) 1610-1740  $\text{cm}^{-1}$ .

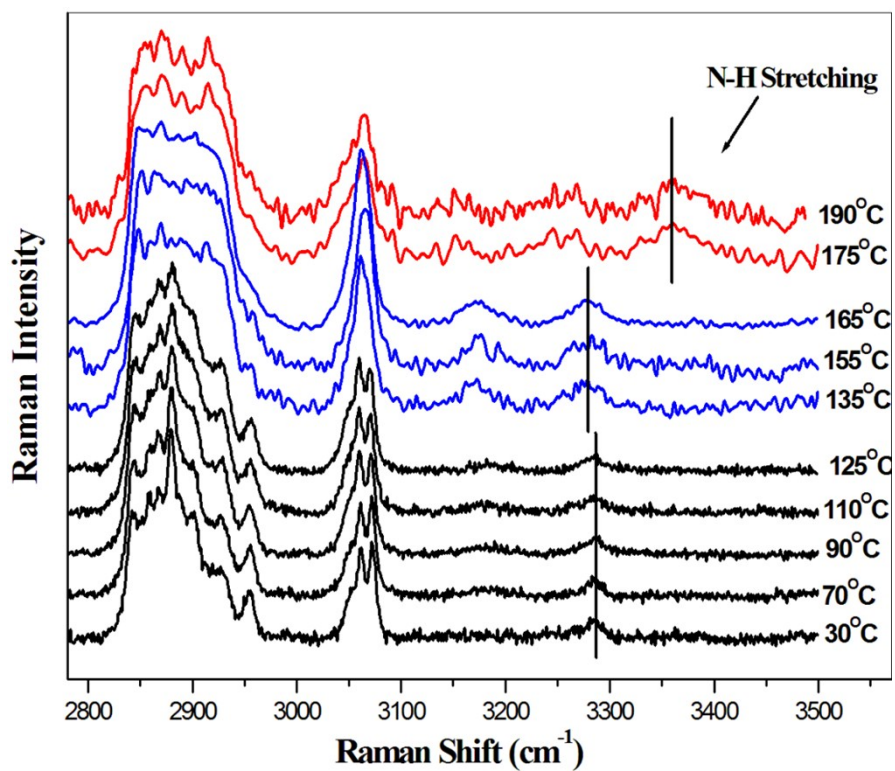

**Fig. SI 12** Raman Spectra of compound N-(4-(dodecyloxy)benzylidene)-4-{{4'-(dodecyloxy)benzylidene)amino} benzohydrazide, **1**(n=12) at different phases, 2770-3500  $\text{cm}^{-1}$ .

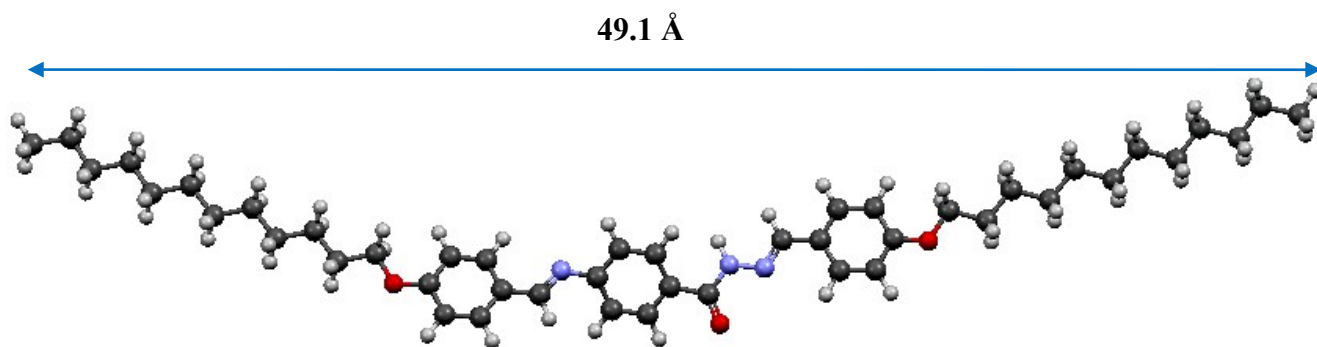

**Fig. SI 13** The optimized structure of N-(4-(dodecyloxy)benzylidene)-4-{{4'-(dodecyloxy)benzylidene)amino} benzohydrazide, **1**(n=12) by DFT method at B3LYP/6-311++G(d,p) level.

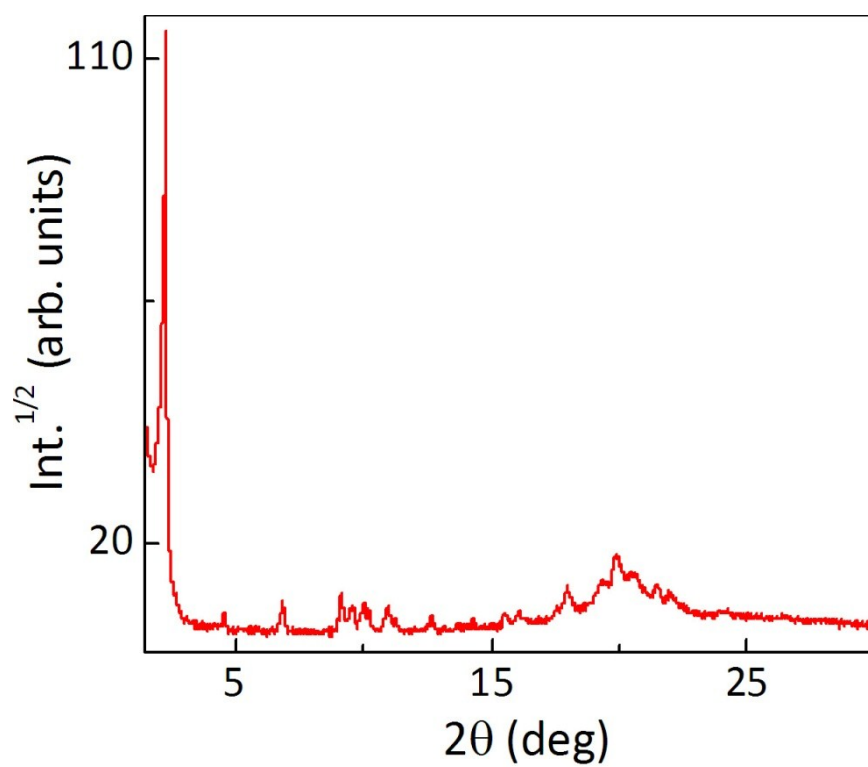

Fig. SI 14 XRD pattern of compound 2 (n=12) at 125°C.

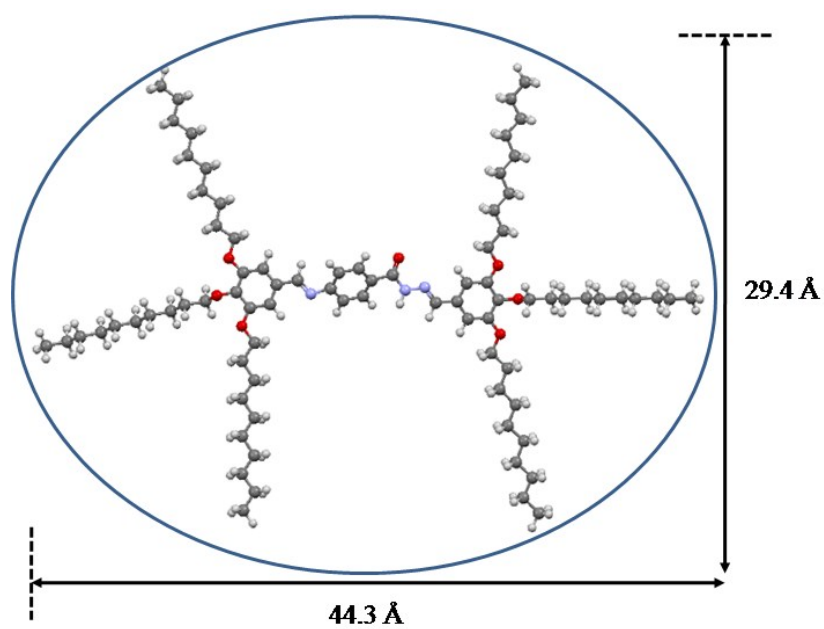

Fig. SI 15 The optimized structure of N-(3,4,5-tris(decyloxy)benzylidene)-4-((3',4',5'-tris(decyloxy)benzylidene)amino)benzohydrazide (**5**, n=10).

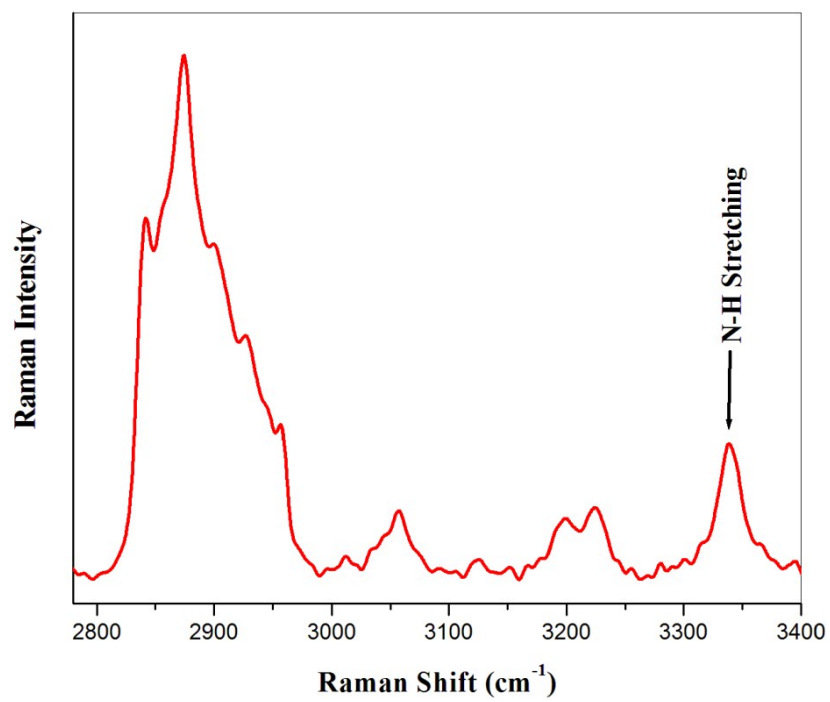

**Fig. SI 16** Room temperature Raman spectrum of compound **5**( n=10).

**Table SI 1.** Thermal Transitions and Corresponding Thermodynamic Parameters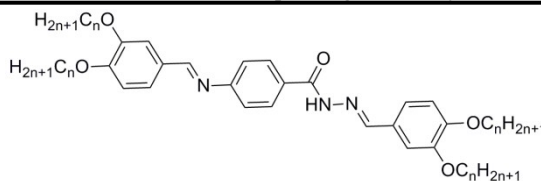

| Compound        | T, °C [ $\Delta H$ , kJ/mol; $\Delta S$ , J/(mol K)] |                                                    |
|-----------------|------------------------------------------------------|----------------------------------------------------|
|                 | Heating                                              | Cooling                                            |
| <b>2</b> (n=5)  | Cr 139.8 (16.2; 39.1) Cr' 197.6 (32.5; 69.1) i       | i 193.2 (-38.8; -83.2) Cr                          |
| <b>2</b> (n=6)  | Cr 173.5 (23.2; 51.9) Cr' 192.3 (28.8; 61.8) i       | i 184.7 (-36.8; -80.4) Cr                          |
| <b>2</b> (n=7)  | Cr 188.5 (41.7; 90.4) i                              | i 183.8 (-29.7; -65.0) Cr' 113.8 (-20.1; -52.0) Cr |
| <b>2</b> (n=8)  | Cr 182.9 (49.4; 108.3) i                             | i 171.5 (-46.3; -104.1) Cr                         |
| <b>2</b> (n=10) | Cr 141.9 (57.5; 138.3) Cr' 180.3 (12.9; 28.4) i      | i 175.0 (-7.2; -16.1) Cr                           |
| <b>2</b> (n=12) | Cr 169.7 (42.4; 95.7) i                              | i 163.9 (-23.6; -53.9) Cr' 136.3 (-12.5; -30.6) Cr |
| <b>2</b> (n=14) | Cr 163.7 (72.2; 165.4) i                             | i 161.2 (-54.2; -124.9) Cr                         |
| <b>2</b> (n=16) | Cr 157.5 (60.2; 139.8) i                             | i 148.9 (-36.5; -86.6) Cr                          |

Abbreviations: Cr & Cr' = crystalline state, i = isotropic liquid.

**Table SI 2.** Thermal Transitions and Corresponding Thermodynamic Parameters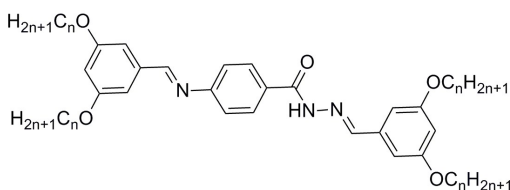

| Compound        | T, °C [ $\Delta H$ , kJ/mol; $\Delta S$ , J/(mol K)] |                                                    |
|-----------------|------------------------------------------------------|----------------------------------------------------|
|                 | Heating                                              | Cooling                                            |
| <b>3</b> (n=5)  | Cr 172.2 (55.1; 123.8) i                             | i 160.2 (-42.1; -97.2) Cr' 146.7 (-9.3; -22.1) Cr  |
| <b>3</b> (n=6)  | Cr 130.9 (32.4; 80.2) Cr' 163.8 (24.6; 56.5) i       | i 157.3 (-57.0; -132.4) Cr                         |
| <b>3</b> (n=7)  | Cr 161.6 (45.1; 103.8) i                             | i 160.8 (-36.6; -84.4) Cr' 153.5 (-15.7; -36.7) Cr |
| <b>3</b> (n=8)  | Cr 115.8 (26.6; 68.4) Cr' 154.8 (67.8; 158.4) i      | i 144.2 (-46.6; -111.4) Cr                         |
| <b>3</b> (n=10) | Cr 150.9 (84.8; 199.9) i                             | i 135.6 (-82.1; -200.9) Cr                         |
| <b>3</b> (n=12) | Cr 134.5 (13.4; 32.8) Cr' 148.1 (29.2; 69.2) i       | i 142.5 (-37.1; -89.2) Cr                          |
| <b>3</b> (n=14) | Cr 143.1 (49.4; 118.6) i                             | i 138.5 (-48.0; -116.7) Cr                         |
| <b>3</b> (n=16) | Cr 140.8 (26.2; 63.2) i                              | i 136.9 (-42.4; -103.4) Cr                         |

Abbreviations: Cr & Cr' = crystalline state, i = isotropic liquid.
